# Supplementary material for: Rational Computational Approaches in Drug Discovery: Potential Inhibitors for Allosteric Regulation of Mutant Isocitrate Dehydrogenase-1 Enzyme in Cancers
Source: MDPI journal article supplement (doi:10.3390/molecules28052315), 2023-03-02
Supplement: s1 [file s1]

# **Supplementary Information Table of Contents**

|                               |            |
|-------------------------------|------------|
| <b>Table of Contents.....</b> | <b>2-3</b> |
|-------------------------------|------------|

|                             |             |
|-----------------------------|-------------|
| <b>List of Figures.....</b> | <b>4-10</b> |
|-----------------------------|-------------|

|                            |              |
|----------------------------|--------------|
| <b>List of Tables.....</b> | <b>11-42</b> |
|----------------------------|--------------|

## **1. Figures**

| <b>Figures No</b> | <b>Figures Title</b>                                                                        | <b>Page No</b> |
|-------------------|---------------------------------------------------------------------------------------------|----------------|
| S1-A              | The molecular docking results for reference compound (RC-01) interaction with the receptor. | 4              |
| S1-B              | The molecular docking results for reference compound (RC-02) interaction with the receptor. | 4              |
| S1-C              | The molecular docking results for designed compound (DC-01) interaction with the receptor.  | 5              |
| S1-D              | The molecular docking results for designed compound (DC-02) interaction with the receptor.  | 6              |
| S1-E              | The molecular docking results for designed compound (DC-03) interaction with the receptor.  | 6              |

|      |                                                                                                                    |    |
|------|--------------------------------------------------------------------------------------------------------------------|----|
| S1-F | The molecular docking results for designed compound (DC-04) interaction with the receptor.                         | 7  |
| S1-G | The molecular docking results for designed compound (DC-05) interaction with the receptor.                         | 7  |
| S2-A | The MD simulation results for reference compound (RC-01) interaction with the receptor at the final frame (50 ns). | 8  |
| S2-B | The MD simulation results for reference compound (RC-02) interaction with the receptor at the final frame (50 ns). | 8  |
| S2-C | The MD simulation results for designed compound (DC-01) interaction with the receptor at the final frame (50 ns).  | 9  |
| S2-D | The MD simulation results for designed compound (DC-02) interaction with the receptor at the final frame (50 ns).  | 9  |
| S2-E | The MD simulation results for designed compound (DC-03) interaction with the receptor at the final frame (50 ns).  | 10 |
| S2-F | The MD simulation results for designed compound (DC-04) interaction with the receptor at the final frame (50 ns).  | 10 |

## 2. Tables

| Tables No | Tables Title                                                                                      | Page No |
|-----------|---------------------------------------------------------------------------------------------------|---------|
| S1        | The PLS statistical data of the homogenous 3D-QSAR model using the Field-Based method.            | 11      |
| S2        | The physiochemical property contribution of reported compounds using the FB-3D-QSAR method.       | 11      |
| S3        | The molecular docking results for 62 reported compounds using Glide package in Schrodinger suite. | 11-14   |

|      |                                                                                                                                         |       |
|------|-----------------------------------------------------------------------------------------------------------------------------------------|-------|
| S4   | The molecular docking results for 229 designed compounds using Glide package in Schrodinger suite.                                      | 14-24 |
| S4-A | The molecular docking results for 371 designed compounds using Glide package in Schrodinger suite.                                      | 25-41 |
| S5   | The specific residues involved in the receptor-ligand interaction of reference and designed compounds using molecular docking analysis. | 41-42 |

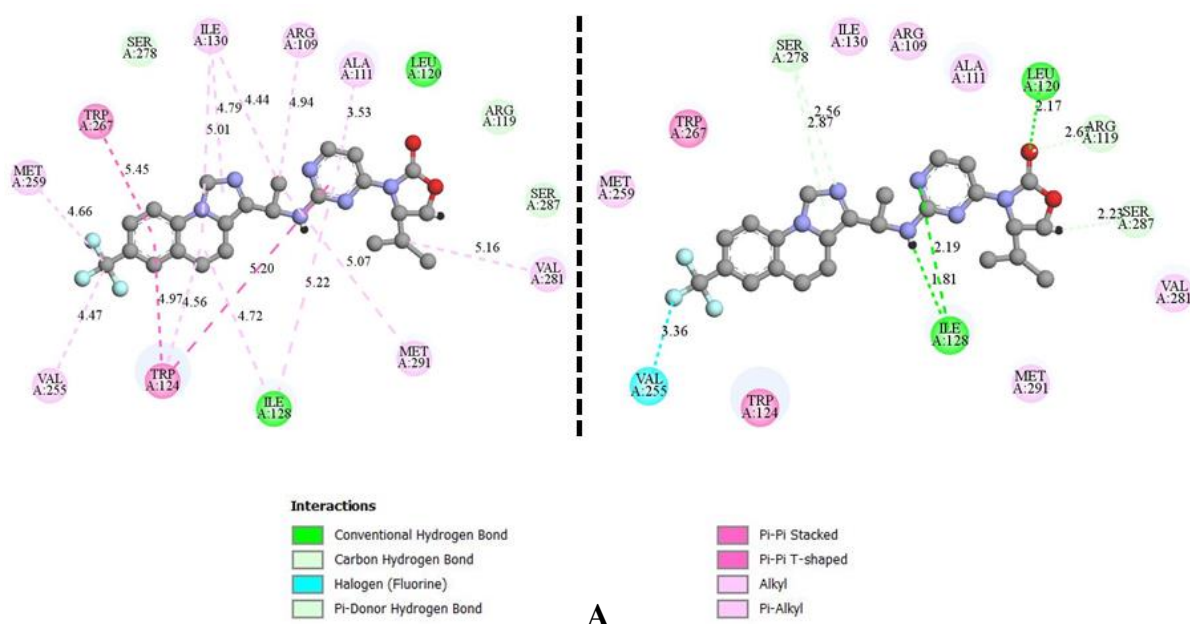

**Figure S1-A:** The molecular docking results for reference compound (RC-01) interaction with the receptor.

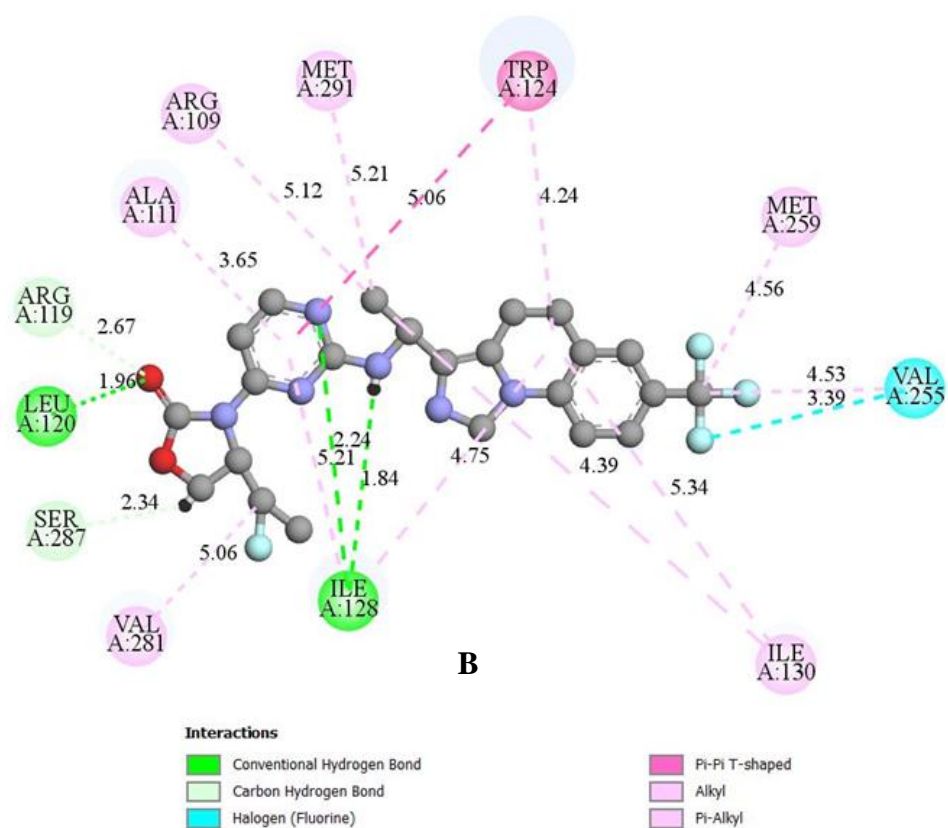

**Figure S1-B:** The molecular docking results for reference compound (RC-02) interaction with the receptor.

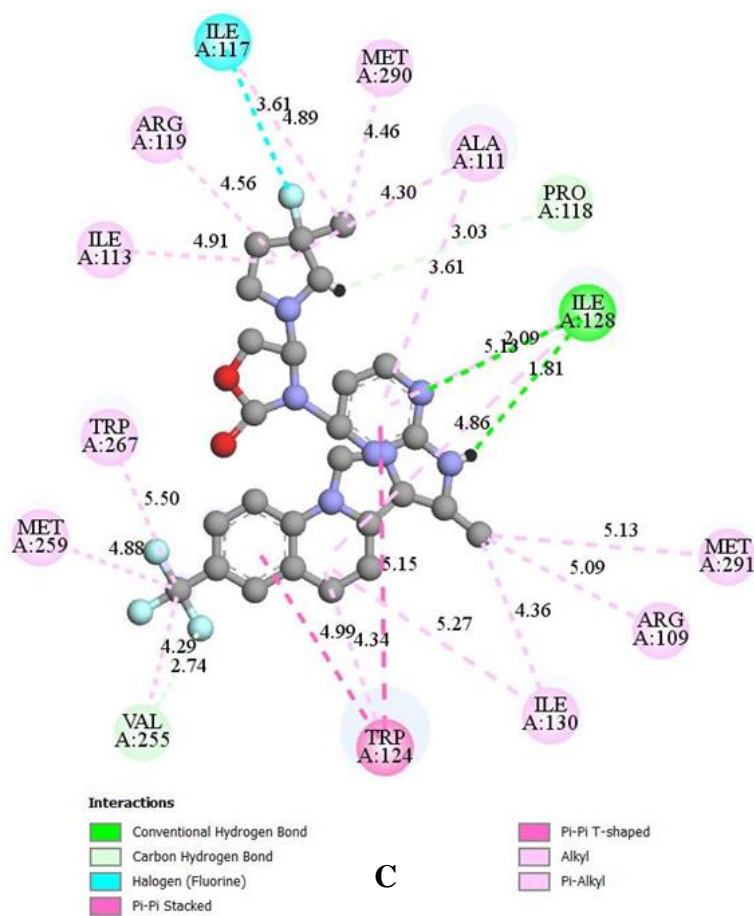

**Figure S1-C:** The molecular docking results for the designed compound (DC-01) interaction with the receptor.

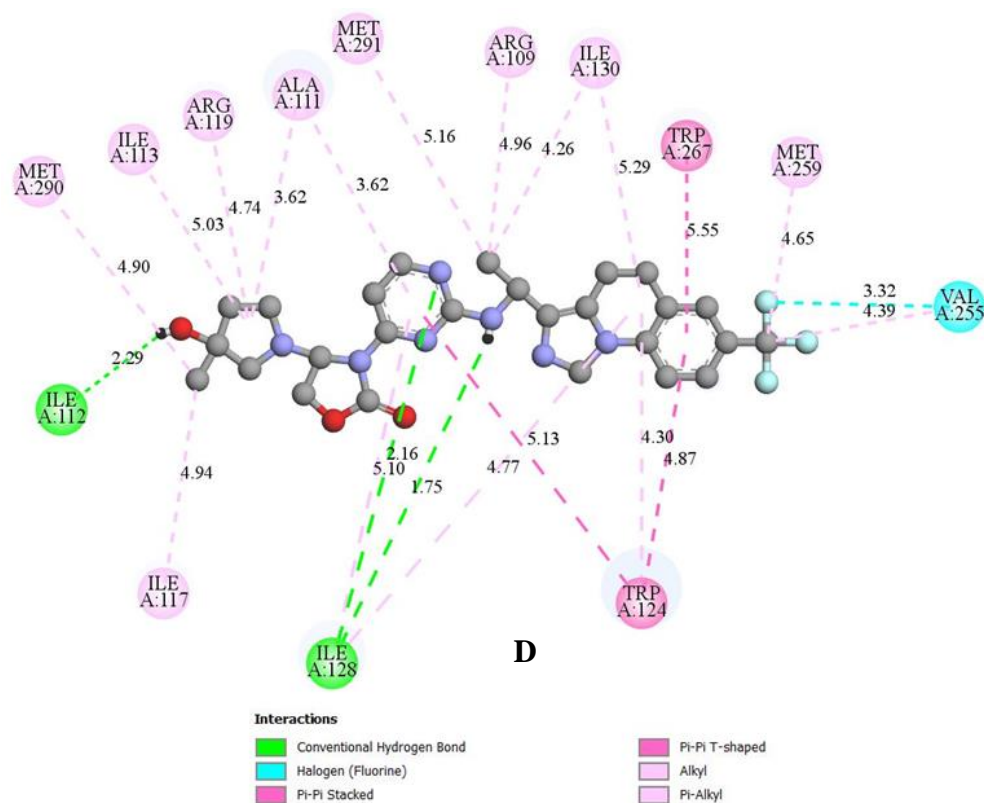

**Figure S1-D:** The molecular docking results for the designed compound (DC-02) interaction with the receptor.

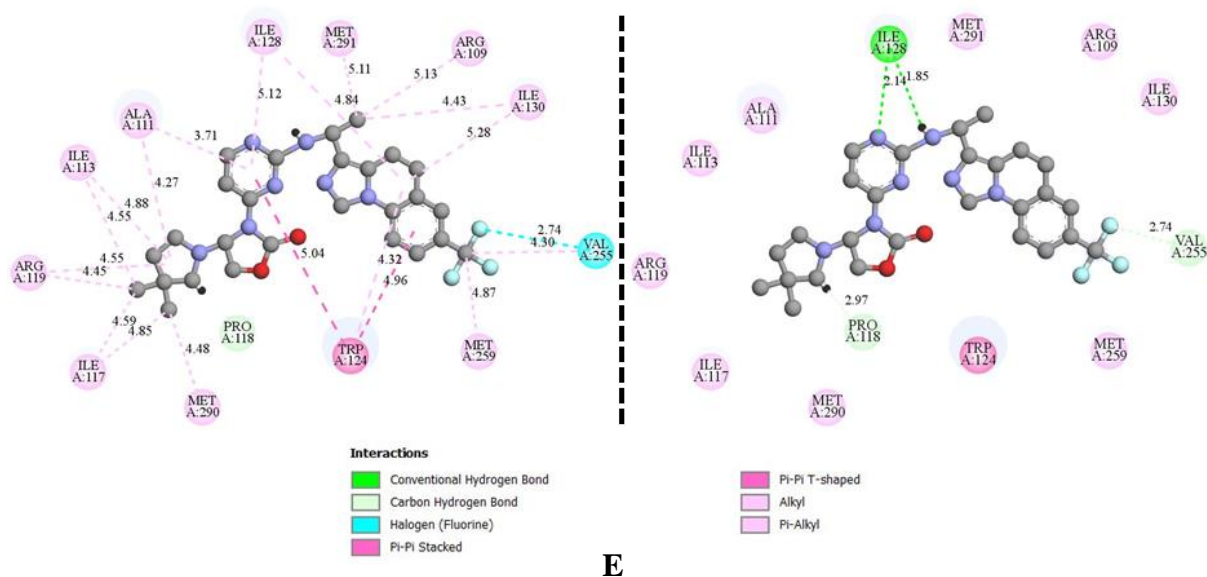

**Figure S1-E:** The molecular docking results for the designed compound (DC-03) interaction with the receptor.

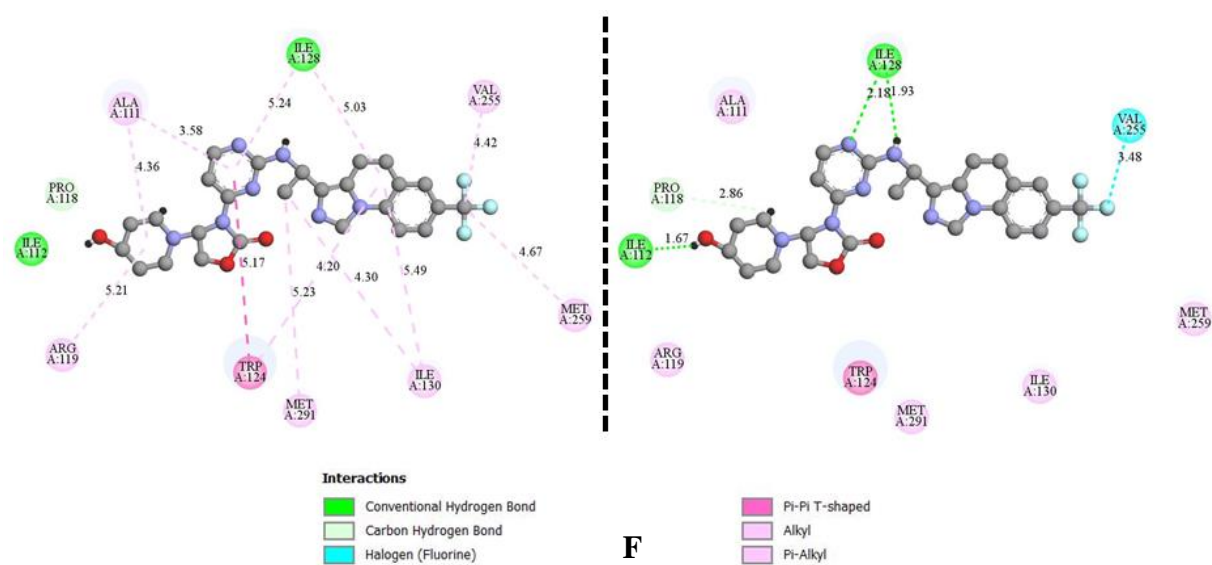

**Figure S1-F:** The molecular docking results for the designed compound (DC-04) interaction with the receptor.

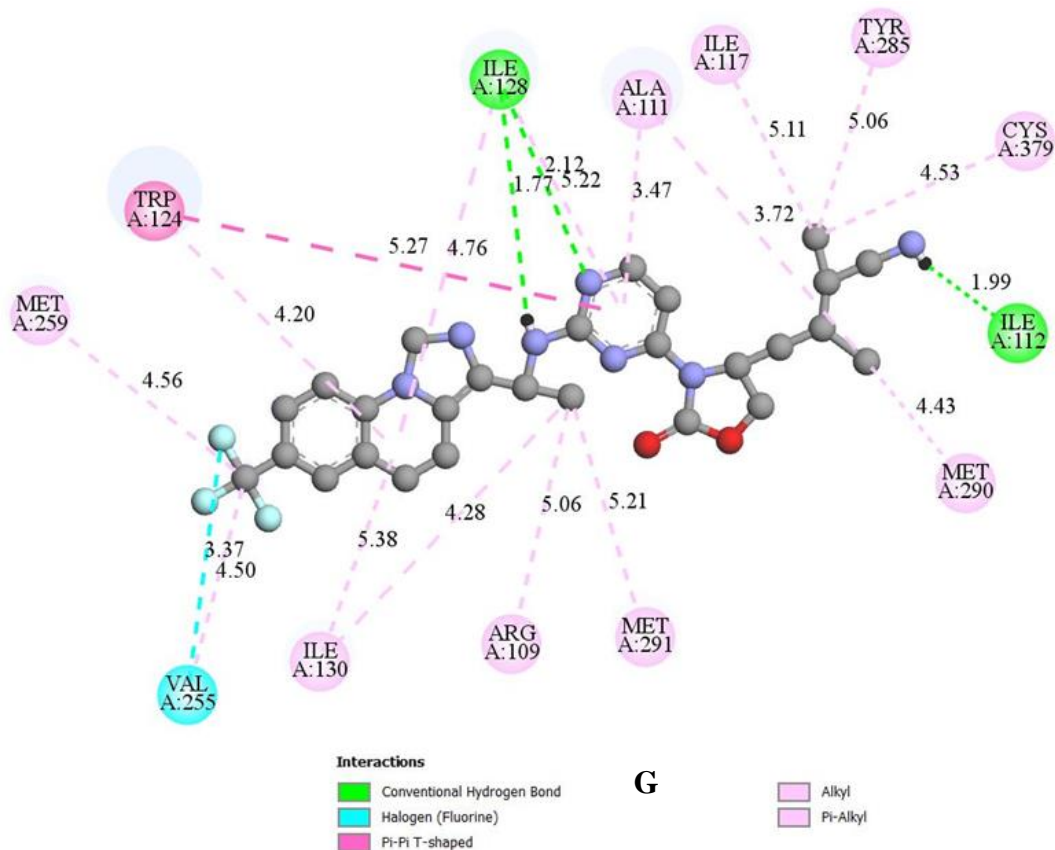

**Figure S1-G:** The molecular docking results for the designed compound (DC-05) interaction with the receptor.

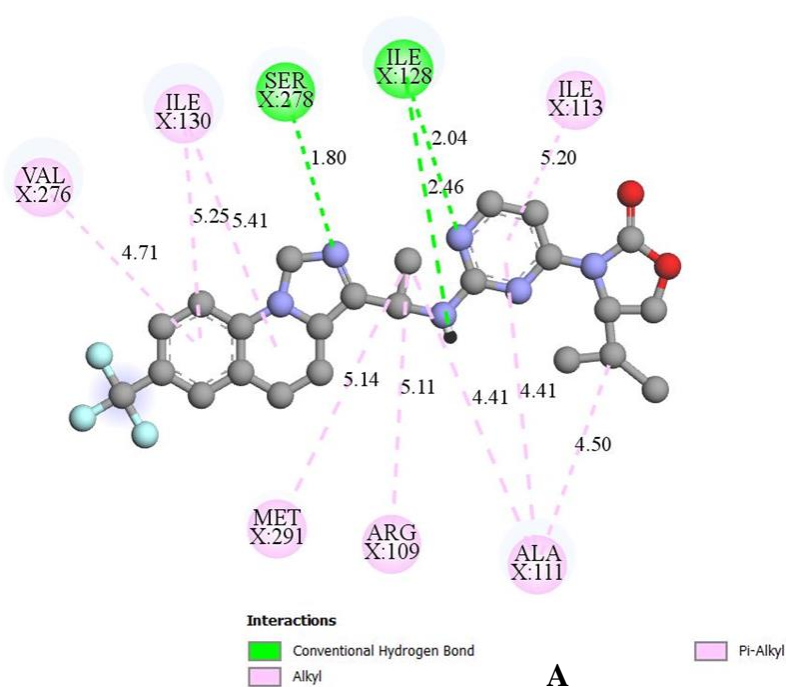

**Figure S2-A:** The MD simulation results for reference compound (RC-01) interaction with the receptor at the final frame (50 ns).

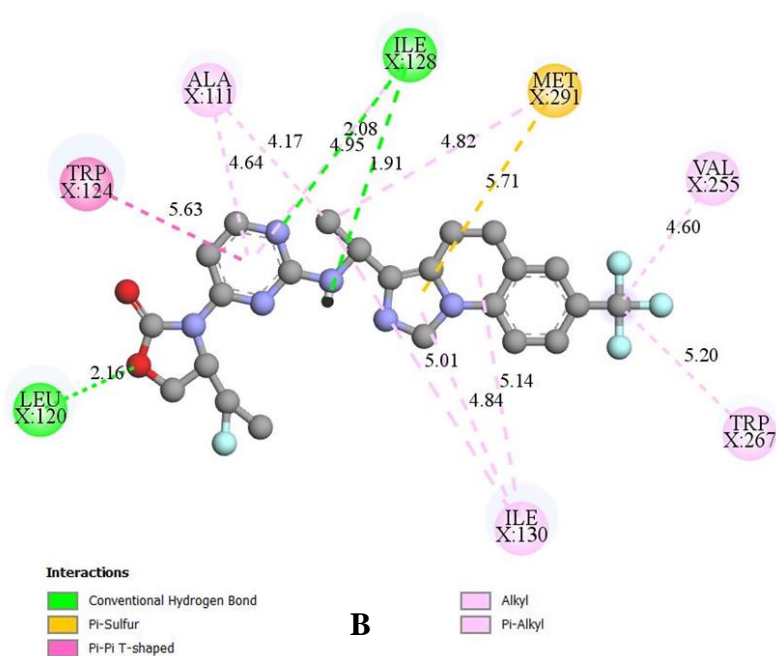

**Figure S2 -B:** The MD simulation results for reference compound (RC-02) interaction with the receptor at the final frame (50 ns).

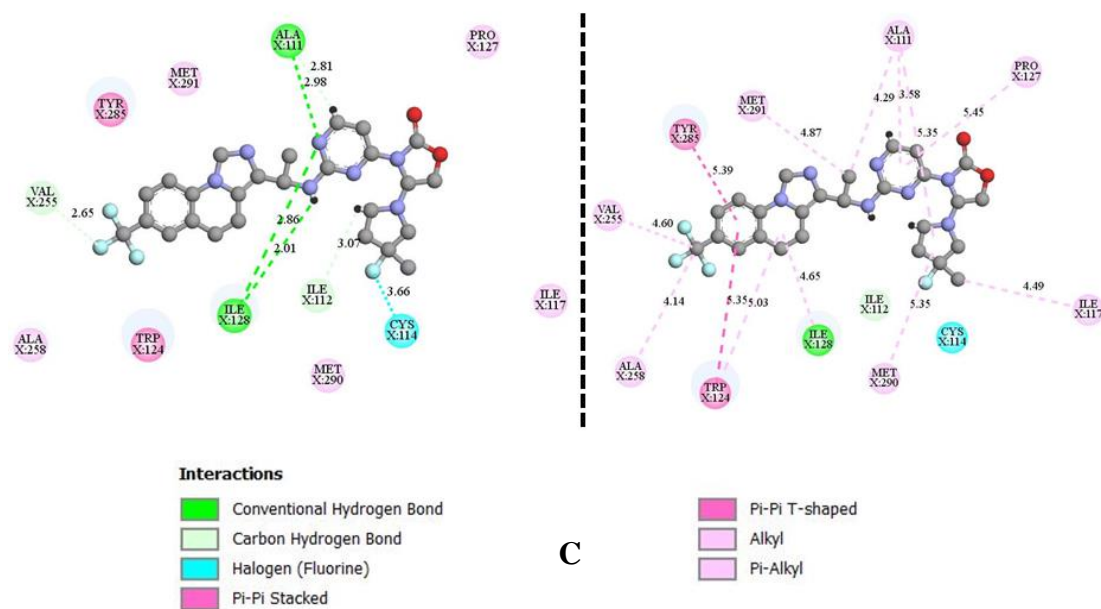

**Figure S2-C:** The MD simulation results for designed compound (DC-01) interaction with the receptor at the final frame (50 ns).

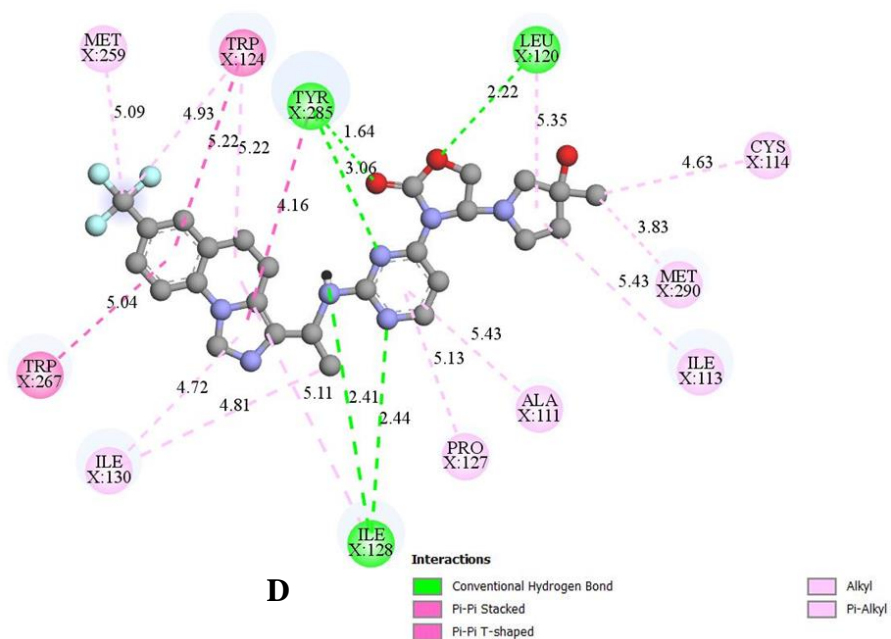

**Figure S2-D:** The MD simulation results for designed compound (DC-02) interaction with the receptor at the final frame (50 ns).

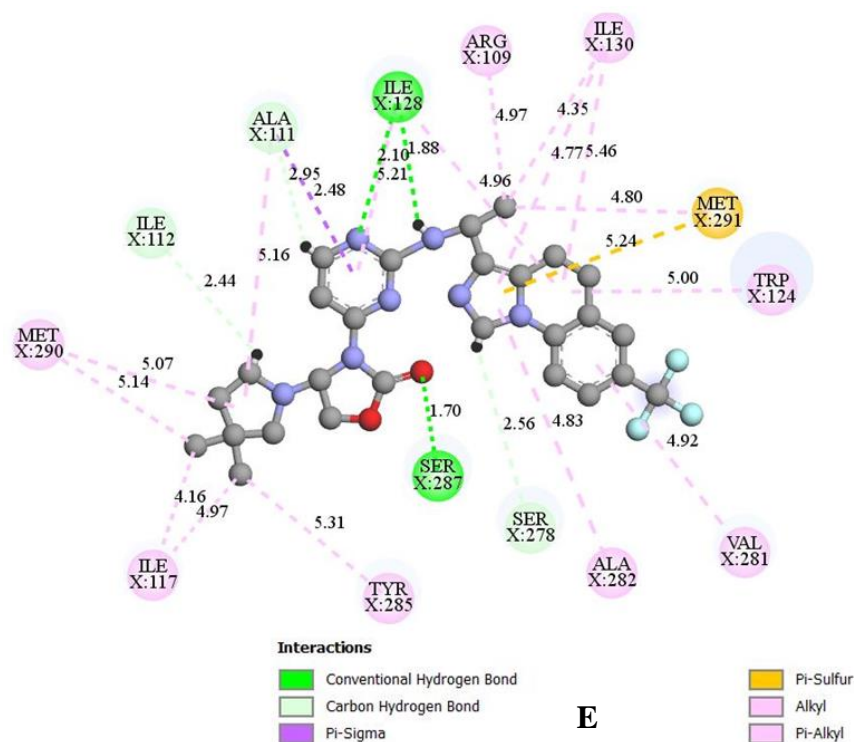

**Figure S2-E:** The MD simulation results for designed compound (DC-03) interaction with the receptor at the final frame (50 ns).

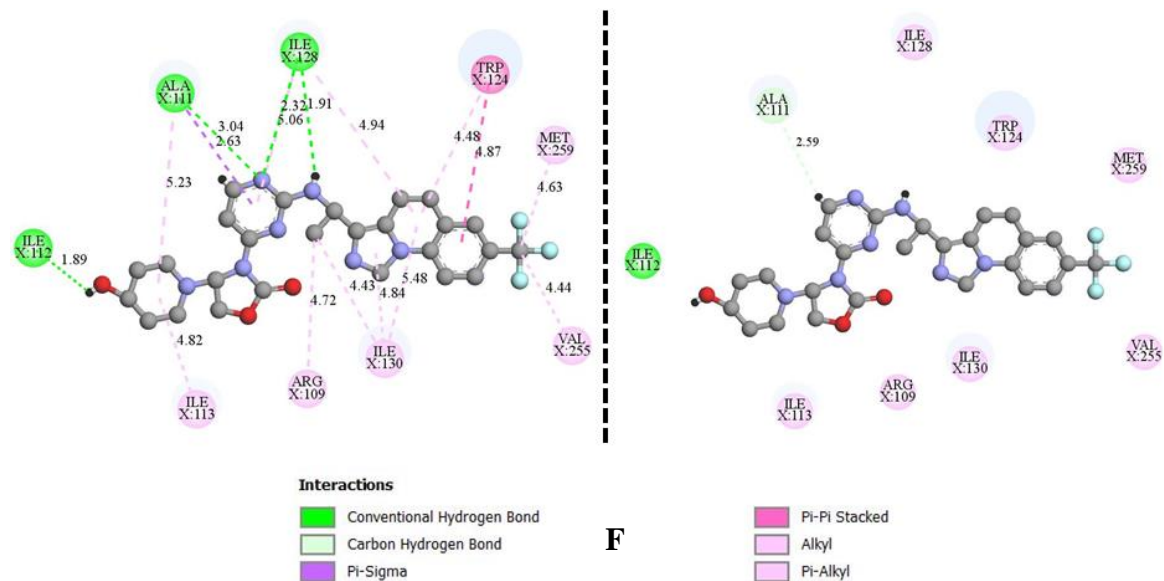

**Figure S2-F:** The MD simulation results for designed compound (DC-04) interaction with the receptor at the final frame (50 ns).

Table S1: The PLS statistical data of the homogenous 3D-QSAR model using the Field-Based method.

| <b>PLS Factors</b> | <b>SD</b>     | <b>R<sup>2</sup></b> | <b>F</b>    | <b>P</b>        | <b>Stability</b> | <b>RMSE</b> | <b>Q<sup>2</sup></b> | <b>Pearson-R</b> |
|--------------------|---------------|----------------------|-------------|-----------------|------------------|-------------|----------------------|------------------|
| 1                  | 0.5453        | 0.1751               | 9.1         | 0.00422         | 0.893            | 0.93        | 0.1641               | 0.4720           |
| 2                  | 0.4141        | 0.5354               | 24.2        | 1.02e-07        | 0.357            | 0.72        | 0.5039               | 0.7400           |
| 3                  | 0.3613        | 0.6547               | 25.9        | 1.46e-09        | 0.663            | 0.72        | 0.4957               | 0.7150           |
| 4                  | 0.3092        | 0.7533               | 30.5        | 1.12e-11        | 0.652            | 0.73        | 0.4794               | 0.6998           |
| 5                  | 0.2534        | 0.8384               | 40.5        | 2.03e-14        | 0.422            | 0.73        | 0.4792               | 0.6996           |
| 6                  | 0.2346        | 0.8651               | 40.6        | 4.73e-15        | 0.398            | 0.73        | 0.4914               | 0.7096           |
| <b>7</b>           | <b>0.1984</b> | <b>0.9060</b>        | <b>51.0</b> | <b>4.40e-17</b> | <b>0.292</b>     | <b>0.71</b> | <b>0.5123</b>        | <b>0.7238</b>    |

SD: Standard Deviation of regression, R<sup>2</sup>: Regression coefficient; F: Ratio of the model variance to the observed activity variance (variance ratio); P: Significance level of variance ratio; RMSE: Root Mean Square Error; Q<sup>2</sup>: Cross validated correlation coefficient.

Table S2: The physiochemical property contribution of reported compounds using the FB-3D-QSAR method.

| <b>PLS Factors</b> | <b>GS</b>     | <b>GE</b>     | <b>GH</b>     | <b>GHA</b>    | <b>GHD</b>    |
|--------------------|---------------|---------------|---------------|---------------|---------------|
| 1                  | 0.6113        | 0.0444        | 0.2500        | 0.0857        | 0.0082        |
| 2                  | 0.5274        | 0.0611        | 0.2861        | 0.1143        | 0.0155        |
| 3                  | 0.5002        | 0.0620        | 0.2861        | 0.1311        | 0.0204        |
| 4                  | 0.4559        | 0.0701        | 0.2945        | 0.1511        | 0.0281        |
| 5                  | 0.4536        | 0.0781        | 0.2966        | 0.1415        | 0.0300        |
| 6                  | 0.4588        | 0.0814        | 0.2873        | 0.1466        | 0.0257        |
| <b>7</b>           | <b>0.4525</b> | <b>0.0936</b> | <b>0.2949</b> | <b>0.1386</b> | <b>0.0201</b> |

Table S3: The Molecular Docking results for 62 reported compounds using Glide package in Schrodinger suite. All the compounds are aligned based on the docking results.

| S.NO | Reported compounds | Docking Score<br>kcal/mol | Glide Score<br>kcal/mol | Glide Energy<br>kcal/mol | Biological activity |
|------|--------------------|---------------------------|-------------------------|--------------------------|---------------------|
| 01   | <b>RC-02</b>       | <b>-12.40318578</b>       | <b>-12.49798578</b>     | <b>-58.60887909</b>      | <b>8.398</b>        |
| 02   | RC-40              | -12.21519926              | -12.36629926            | -56.40876627             | 7.321               |
| 03   | RC-37              | -12.21033635              | -12.30513635            | -57.47235823             | 7.370               |
| 04   | RC-58              | -12.02730268              | -12.03210268            | -60.42112255             | 6.215               |
| 05   | RC-07              | -12.0184906               | -12.6269906             | -63.66662788             | 8.569               |
| 06   | RC-41              | -11.94412274              | -11.94722274            | -59.28271866             | 7.310               |
| 07   | RC-06              | -11.90942478              | -12.08072478            | -59.04856968             | 8.638               |
| 08   | RC-27              | -11.84637272              | -12.48377272            | -62.59935284             | 7.476               |
| 09   | RC-18              | -11.80124026              | -12.20064026            | -61.06906796             | 7.623               |
| 10   | <b>RC-01</b>       | <b>-11.80046427</b>       | <b>-12.98826427</b>     | <b>-63.1635437</b>       | <b>9.000</b>        |
| 11   | RC-05              | -11.70091038              | -12.15221038            | -59.23640299             | 8.658               |
| 12   | RC-20              | -11.65838146              | -11.87388146            | -56.37018681             | 7.618               |
| 13   | RC-39              | -11.64871672              | -12.16491672            | -61.18842983             | 7.328               |
| 14   | RC-12              | -11.63258244              | -12.43048244            | -60.32015228             | 7.824               |
| 15   | RC-55              | -11.62419454              | -11.67379454            | -58.11397839             | 6.575               |
| 16   | RC-19              | -11.60019598              | -12.11639598            | -60.05854416             | 7.620               |
| 17   | RC-24              | -11.49550681              | -12.01170681            | -58.28211498             | 7.523               |
| 18   | RC-61              | -11.4676318               | -11.4815318             | -55.4534359              | 6.080               |
| 19   | RC-15              | -11.45380686              | -11.56860686            | -57.41664314             | 7.735               |
| 20   | RC-32              | -11.3698159               | -11.5505159             | -56.02596569             | 7.409               |
| 21   | RC-44              | -11.36904125              | -11.52704125            | -55.22951841             | 7.252               |

|    |       |              |              |              |       |
|----|-------|--------------|--------------|--------------|-------|
| 22 | RC-10 | -11.3640964  | -11.9280964  | -59.91413975 | 8.097 |
| 23 | RC-33 | -11.30474686 | -11.59564686 | -56.48451948 | 7.398 |
| 24 | RC-25 | -11.28585811 | -11.56525811 | -54.37228632 | 7.495 |
| 25 | RC-13 | -11.28509098 | -11.81229098 | -60.23165703 | 7.824 |
| 26 | RC-45 | -11.28263235 | -11.88163235 | -62.34188271 | 7.208 |
| 27 | RC-57 | -11.27823547 | -11.79443547 | -59.57751942 | 6.252 |
| 28 | RC-08 | -11.27605819 | -11.79735819 | -58.58960819 | 8.398 |
| 29 | RC-23 | -11.24355768 | -11.63265768 | -56.14816046 | 7.569 |
| 30 | RC-43 | -11.1914685  | -11.6390685  | -57.25476646 | 7.268 |
| 31 | RC-21 | -11.13683151 | -11.48823151 | -54.0137372  | 7.602 |
| 32 | RC-17 | -11.13086443 | -11.64706443 | -56.51780701 | 7.658 |
| 33 | RC-35 | -11.06232915 | -11.53952915 | -54.16304111 | 7.377 |
| 34 | RC-59 | -11.05034943 | -11.39204943 | -54.06650257 | 6.142 |
| 35 | RC-53 | -10.97477142 | -11.49097142 | -56.54889679 | 6.620 |
| 36 | RC-29 | -10.96619532 | -11.30789532 | -53.33992529 | 7.456 |
| 37 | RC-11 | -10.95076876 | -11.46696876 | -56.21823978 | 7.886 |
| 38 | RC-51 | -10.93553125 | -11.31873125 | -54.81498146 | 6.818 |
| 39 | RC-52 | -10.93060724 | -11.31380724 | -55.27937222 | 6.658 |
| 40 | RC-46 | -10.87551599 | -11.10511599 | -54.28591919 | 7.187 |
| 41 | RC-22 | -10.849342   | -10.858442   | -58.61487389 | 7.585 |
| 42 | RC-09 | -10.81190734 | -10.81190734 | -52.78634357 | 8.301 |
| 43 | RC-49 | -10.79538276 | -10.87008276 | -54.0499835  | 6.922 |
| 44 | RC-48 | -10.78823451 | -11.17733451 | -54.54394579 | 6.951 |
| 45 | RC-30 | -10.54700017 | -11.02420017 | -56.28851223 | 7.444 |

|    |       |              |              |              |       |
|----|-------|--------------|--------------|--------------|-------|
| 46 | RC-04 | -10.02696142 | -10.11436142 | -54.87780547 | 8.674 |
| 47 | RC-34 | -9.97525621  | -12.19455621 | -57.56530237 | 7.387 |
| 48 | RC-54 | -9.754459832 | -11.43715983 | -55.98697281 | 6.602 |
| 49 | RC-26 | -9.057435743 | -9.546235743 | -48.89270401 | 7.495 |
| 50 | RC-28 | -8.646313018 | -9.823513018 | -58.82368296 | 7.471 |
| 51 | RC-36 | -8.603063268 | -10.95946327 | -50.44523573 | 7.377 |
| 52 | RC-62 | -8.586519258 | -8.680119258 | -52.477736   | 5.000 |
| 53 | RC-50 | -8.32615672  | -8.41205672  | -44.42000431 | 6.891 |
| 54 | RC-47 | -8.23017378  | -10.46047378 | -58.3135004  | 7.071 |
| 55 | RC-16 | -8.228324798 | -10.8175248  | -56.40748596 | 7.717 |
| 56 | RC-14 | -8.084629328 | -8.172029328 | -34.85871998 | 7.810 |
| 57 | RC-42 | -7.811795397 | -9.003095397 | -43.61901388 | 7.294 |
| 58 | RC-03 | -7.487671213 | -8.664871213 | -47.4781667  | 8.678 |
| 59 | RC-38 | -7.455906451 | -10.01620645 | -51.48286676 | 7.354 |
| 60 | RC-60 | -7.241337079 | -7.248437079 | -50.24009466 | 6.086 |
| 61 | RC-56 | -7.207464337 | -7.533064337 | -49.15235996 | 6.320 |
| 62 | RC-31 | -7.064354773 | -7.069154773 | -49.39739859 | 7.444 |

Table S4A: The Molecular Docking results for 229 designed compounds using Glide package in Schrodinger suite. All the compounds are aligned based on the docking results and functional group modifications at 4<sup>th</sup> position of oxazolidine moiety especially in hydrophobic and steric nature.

| S.NO | Designed Compounds | Core SMARTS                                 | Force Field | Predicted Activity 7 | R-Group Modification     | Docking Score<br>kcal/mol | Glide Score<br>kcal/mol | Glide Energy<br>kcal/mol |
|------|--------------------|---------------------------------------------|-------------|----------------------|--------------------------|---------------------------|-------------------------|--------------------------|
| 1    | DC-01              | A=A1AAAA1a2aaa(a2)AAa(aa3)a(a34)AAa5a4aaaa5 | OPLS-2005   | 9.272                | [*]N(C1)CCC1(F)C         | -13.337                   | -13.424                 | -68.865                  |
| 2    | DC-02              | A=A1AAAA1a2aaa(a2)AAa(aa3)a(a34)AAa5a4aaaa5 | OPLS-2005   | 9.180                | [*]N(C1)CCC1(C)O         | -13.175                   | -13.271                 | -70.037                  |
| 3    | DC-03              | A=A1AAAA1a2aaa(a2)AAa(aa3)a(a34)AAa5a4aaaa5 | OPLS-2005   | 9.675                | [*]N(C1)CCC1(C)C         | -13.160                   | -13.256                 | -70.976                  |
| 4    | DC-04              | A=A1AAAA1a2aaa(a2)AAa(aa3)a(a34)AAa5a4aaaa5 | OPLS-2005   | 9.066                | C1CN([*])CCC1O           | -13.131                   | -13.219                 | -71.142                  |
| 5    | DC-05              | A=A1AAAA1a2aaa(a2)AAa(aa3)a(a34)AAa5a4aaaa5 | OPLS-2005   | 9.154                | [*]CC(C)[C@@H](C)C<br>N  | -12.952                   | -13.045                 | -65.953                  |
| 6    | DC-06              | A=A1AAAA1a2aaa(a2)AAa(aa3)a(a34)AAa5a4aaaa5 | OPLS-2005   | 9.359                | [*]N(C1)CC[C@H]1<br>CC   | -12.789                   | -12.887                 | -63.641                  |
| 7    | DC-07              | A=A1AAAA1a2aaa(a2)AAa(aa3)a(a34)AAa5a4aaaa5 | OPLS-2005   | 9.132                | [*]N(C1)CCC1(C)N         | -12.717                   | -12.804                 | -69.332                  |
| 8    | DC-08              | A=A1AAAA1a2aaa(a2)AAa(aa3)a(a34)AAa5a4aaaa5 | OPLS-2005   | 9.122                | [*]CCC(C)(C)CO           | -12.692                   | -12.786                 | -66.540                  |
| 9    | DC-09              | A=A1AAAA1a2aaa(a2)AAa(aa3)a(a34)AAa5a4aaaa5 | OPLS-2005   | 9.212                | [*]N(C1)CCC1[NH-]        | -12.479                   | -12.631                 | -70.160                  |
| 10   | DC-10              | A=A1AAAA1a2aaa(a2)AAa(aa3)a(a34)AAa5a4aaaa5 | OPLS-2005   | 9.329                | [*]CC1(C)C(C)(C)C1       | -12.449                   | -12.541                 | -59.467                  |
| 11   | DC-11              | A=A1AAAA1a2aaa(a2)AAa(aa3)a(a34)AAa5a4aaaa5 | OPLS-2005   | 9.066                | C1CN([*])CCC1O           | -12.407                   | -13.584                 | -75.126                  |
| 12   | DC-12              | A=A1AAAA1a2aaa(a2)AAa(aa3)a(a34)AAa5a4aaaa5 | OPLS-2005   | 9.122                | [*]CCC(C)(C)CO           | -12.348                   | -13.532                 | -70.932                  |
| 13   | DC-13              | A=A1AAAA1a2aaa(a2)AAa(aa3)a(a34)AAa5a4aaaa5 | OPLS-2005   | 9.082                | [*]C[C@H](F)CCC          | -12.296                   | -12.389                 | -62.131                  |
| 14   | DC-14              | A=A1AAAA1a2aaa(a2)AAa(aa3)a(a34)AAa5a4aaaa5 | OPLS-2005   | 9.361                | [*]N(C1)CC1[C@H](<br>F)C | -12.250                   | -12.467                 | -58.921                  |
| 15   | DC-15              | A=A1AAAA1a2aaa(a2)AAa(aa3)a(a34)AAa5a4aaaa5 | OPLS-2005   | 9.170                | [*]OC[C@H](C)C1CC1       | -12.229                   | -12.316                 | -63.748                  |
| 16   | DC-16              | A=A1AAAA1a2aaa(a2)AAa(aa3)a(a34)AAa5a4aaaa5 | OPLS-2005   | 9.023                | [*]N(C1)CC1C#N           | -12.126                   | -12.214                 | -66.929                  |
| 17   | DC-17              | A=A1AAAA1a2aaa(a2)AAa(aa3)a(a34)AAa5a4aaaa5 | OPLS-2005   | 9.057                | [*]C[C@H](C(C)C)N<br>C   | -12.104                   | -12.191                 | -64.202                  |
| 18   | DC-18              | A=A1AAAA1a2aaa(a2)AAa(aa3)a(a34)AAa5a4aaaa5 | OPLS-2005   | 9.118                | [*]NCC1(F)CCC1           | -12.095                   | -12.197                 | -62.356                  |

|    |       |                                              |           |       |                       |         |         |         |
|----|-------|----------------------------------------------|-----------|-------|-----------------------|---------|---------|---------|
| 19 | DC-19 | A=A1AAAA1a2aaaa(a2)AAa(aa3)a(a34)AAa5a4aaaa5 | OPLS-2005 | 9.115 | [*]N(C1)CC1(C)CN      | -12.094 | -12.522 | -59.969 |
| 20 | DC-20 | A=A1AAAA1a2aaaa(a2)AAa(aa3)a(a34)AAa5a4aaaa5 | OPLS-2005 | 9.171 | O1CCN([*])C[C@@H]1C   | -12.054 | -12.142 | -66.797 |
| 21 | DC-21 | A=A1AAAA1a2aaaa(a2)AAa(aa3)a(a34)AAa5a4aaaa5 | OPLS-2005 | 9.125 | [*]N(C)C1(CO)CC1      | -11.971 | -12.059 | -62.701 |
| 22 | DC-22 | A=A1AAAA1a2aaaa(a2)AAa(aa3)a(a34)AAa5a4aaaa5 | OPLS-2005 | 9.261 | [*]N(C1)CC1(N)CC      | -11.943 | -12.630 | -62.174 |
| 23 | DC-23 | A=A1AAAA1a2aaaa(a2)AAa(aa3)a(a34)AAa5a4aaaa5 | OPLS-2005 | 9.111 | [*]N(C1)CC1CCO        | -11.929 | -13.114 | -68.208 |
| 24 | DC-24 | A=A1AAAA1a2aaaa(a2)AAa(aa3)a(a34)AAa5a4aaaa5 | OPLS-2005 | 9.359 | [*]N(C1)CC[C@@H]1CC   | -11.850 | -13.038 | -65.604 |
| 25 | DC-25 | A=A1AAAA1a2aaaa(a2)AAa(aa3)a(a34)AAa5a4aaaa5 | OPLS-2005 | 9.361 | [*]N(C1)CC1[C@@H](F)C | -11.850 | -12.902 | -62.570 |
| 26 | DC-26 | A=A1AAAA1a2aaaa(a2)AAa(aa3)a(a34)AAa5a4aaaa5 | OPLS-2005 | 9.291 | [*]CC(C)CCC           | -11.800 | -11.895 | -61.609 |
| 27 | DC-27 | A=A1AAAA1a2aaaa(a2)AAa(aa3)a(a34)AAa5a4aaaa5 | OPLS-2005 | 9.125 | [*]N(C)C1(CO)CC1      | -11.779 | -12.956 | -64.924 |
| 28 | DC-28 | A=A1AAAA1a2aaaa(a2)AAa(aa3)a(a34)AAa5a4aaaa5 | OPLS-2005 | 9.118 | [*]NCC1(F)CCCC1       | -11.726 | -12.918 | -66.453 |
| 29 | DC-29 | A=A1AAAA1a2aaaa(a2)AAa(aa3)a(a34)AAa5a4aaaa5 | OPLS-2005 | 9.033 | [*]N(C1)CC1(F)CN      | -11.717 | -12.940 | -68.027 |
| 30 | DC-30 | A=A1AAAA1a2aaaa(a2)AAa(aa3)a(a34)AAa5a4aaaa5 | OPLS-2005 | 9.246 | [*]N(C)C(C)(C)CC      | -11.715 | -11.811 | -60.795 |
| 31 | DC-31 | A=A1AAAA1a2aaaa(a2)AAa(aa3)a(a34)AAa5a4aaaa5 | OPLS-2005 | 9.195 | [*]N(C)C1(C)CC1       | -11.670 | -11.757 | -60.891 |
| 32 | DC-32 | A=A1AAAA1a2aaaa(a2)AAa(aa3)a(a34)AAa5a4aaaa5 | OPLS-2005 | 9.193 | [*]N(C1)CCCC1O        | -11.662 | -11.759 | -58.350 |
| 33 | DC-33 | A=A1AAAA1a2aaaa(a2)AAa(aa3)a(a34)AAa5a4aaaa5 | OPLS-2005 | 9.212 | [*]N(C1)CCC1[NH-]     | -11.655 | -12.896 | -72.199 |
| 34 | DC-34 | A=A1AAAA1a2aaaa(a2)AAa(aa3)a(a34)AAa5a4aaaa5 | OPLS-2005 | 9.187 | [*]CCC(C)CN           | -11.644 | -12.826 | -66.645 |
| 35 | DC-35 | A=A1AAAA1a2aaaa(a2)AAa(aa3)a(a34)AAa5a4aaaa5 | OPLS-2005 | 9.173 | [*]N(C)C(C)CC         | -11.625 | -11.722 | -62.239 |
| 36 | DC-36 | A=A1AAAA1a2aaaa(a2)AAa(aa3)a(a34)AAa5a4aaaa5 | OPLS-2005 | 9.208 | [*]N1CCCC1CO          | -11.624 | -11.712 | -61.083 |
| 37 | DC-37 | A=A1AAAA1a2aaaa(a2)AAa(aa3)a(a34)AAa5a4aaaa5 | OPLS-2005 | 9.061 | [*]N1CC[C@@H]1CC      | -11.622 | -11.715 | -52.290 |
| 38 | DC-38 | A=A1AAAA1a2aaaa(a2)AAa(aa3)a(a34)AAa5a4aaaa5 | OPLS-2005 | 9.210 | [*]N(C1)CC1(F)C       | -11.547 | -12.588 | -59.526 |
| 39 | DC-39 | A=A1AAAA1a2aaaa(a2)AAa(aa3)a(a34)AAa5a4aaaa5 | OPLS-2005 | 9.217 | [*]CC(C)(C)CCO        | -11.523 | -11.617 | -61.726 |
| 40 | DC-40 | A=A1AAAA1a2aaaa(a2)AAa(aa3)a(a34)AAa5a4aaaa5 | OPLS-2005 | 9.064 | CC(C)N([*])C(C)C      | -11.389 | -11.483 | -58.072 |
| 41 | DC-41 | A=A1AAAA1a2aaaa(a2)AAa(aa3)a(a34)AAa5a4aaaa5 | OPLS-2005 | 9.092 | [*]N(C1)CC1C          | -11.326 | -11.420 | -58.496 |

|    |       |                                              |           |       |                     |         |         |         |
|----|-------|----------------------------------------------|-----------|-------|---------------------|---------|---------|---------|
| 42 | DC-42 | A=A1AAAA1a2aaaa(a2)AAa(aa3)a(a34)AAa5a4aaaa5 | OPLS-2005 | 9.195 | [*]N(C)C1(C)CC1     | -11.305 | -12.482 | -61.733 |
| 43 | DC-43 | A=A1AAAA1a2aaaa(a2)AAa(aa3)a(a34)AAa5a4aaaa5 | OPLS-2005 | 9.026 | [*]N(C1)CC[C@@H]1O  | -11.289 | -12.466 | -70.195 |
| 44 | DC-44 | A=A1AAAA1a2aaaa(a2)AAa(aa3)a(a34)AAa5a4aaaa5 | OPLS-2005 | 9.068 | [*]N(C)C1(C)CCC1    | -11.278 | -11.380 | -53.988 |
| 45 | DC-45 | A=A1AAAA1a2aaaa(a2)AAa(aa3)a(a34)AAa5a4aaaa5 | OPLS-2005 | 9.032 | [*]N(C)C1(CN)CC1    | -11.249 | -11.336 | -60.047 |
| 46 | DC-46 | A=A1AAAA1a2aaaa(a2)AAa(aa3)a(a34)AAa5a4aaaa5 | OPLS-2005 | 9.035 | [*]N1CCCC1C         | -11.196 | -11.289 | -57.093 |
| 47 | DC-47 | A=A1AAAA1a2aaaa(a2)AAa(aa3)a(a34)AAa5a4aaaa5 | OPLS-2005 | 9.157 | [*]N(C1)CC1(F)C#N   | -11.139 | -11.227 | -64.682 |
| 48 | DC-48 | A=A1AAAA1a2aaaa(a2)AAa(aa3)a(a34)AAa5a4aaaa5 | OPLS-2005 | 9.055 | C1CN([*])CCC1N      | -11.113 | -11.201 | -63.100 |
| 49 | DC-49 | A=A1AAAA1a2aaaa(a2)AAa(aa3)a(a34)AAa5a4aaaa5 | OPLS-2005 | 9.121 | [*]CC(N)(CC)CC      | -11.101 | -11.189 | -52.628 |
| 50 | DC-50 | A=A1AAAA1a2aaaa(a2)AAa(aa3)a(a34)AAa5a4aaaa5 | OPLS-2005 | 9.167 | [*]N(C1)CCC[C@@H]1N | -11.096 | -11.184 | -60.253 |
| 51 | DC-51 | A=A1AAAA1a2aaaa(a2)AAa(aa3)a(a34)AAa5a4aaaa5 | OPLS-2005 | 9.210 | [*]N(C1)CC1(F)C     | -11.095 | -11.315 | -57.689 |
| 52 | DC-52 | A=A1AAAA1a2aaaa(a2)AAa(aa3)a(a34)AAa5a4aaaa5 | OPLS-2005 | 9.212 | [*]N(C1)CCC1[NH-]   | -11.068 | -12.507 | -67.600 |
| 53 | DC-53 | A=A1AAAA1a2aaaa(a2)AAa(aa3)a(a34)AAa5a4aaaa5 | OPLS-2005 | 9.487 | [*]N(C1)CCC[C@@H]1C | -11.037 | -13.116 | -64.469 |
| 54 | DC-54 | A=A1AAAA1a2aaaa(a2)AAa(aa3)a(a34)AAa5a4aaaa5 | OPLS-2005 | 9.192 | [*]N1CCCC1F         | -11.031 | -11.118 | -61.265 |
| 55 | DC-55 | A=A1AAAA1a2aaaa(a2)AAa(aa3)a(a34)AAa5a4aaaa5 | OPLS-2005 | 9.286 | [*]N(C1)CC1(C)OC    | -11.028 | -11.516 | -57.233 |
| 56 | DC-56 | A=A1AAAA1a2aaaa(a2)AAa(aa3)a(a34)AAa5a4aaaa5 | OPLS-2005 | 9.096 | [*]N(C1)CC1(C)CO    | -10.996 | -12.196 | -65.871 |
| 57 | DC-57 | A=A1AAAA1a2aaaa(a2)AAa(aa3)a(a34)AAa5a4aaaa5 | OPLS-2005 | 9.407 | [*]N(C1)CCC1C       | -10.965 | -12.151 | -56.812 |
| 58 | DC-58 | A=A1AAAA1a2aaaa(a2)AAa(aa3)a(a34)AAa5a4aaaa5 | OPLS-2005 | 9.035 | [*]N1CCCC1C         | -10.941 | -12.124 | -62.715 |
| 59 | DC-59 | A=A1AAAA1a2aaaa(a2)AAa(aa3)a(a34)AAa5a4aaaa5 | OPLS-2005 | 9.504 | [*]CCCCCCCC1        | -10.940 | -12.124 | -60.539 |
| 60 | DC-60 | A=A1AAAA1a2aaaa(a2)AAa(aa3)a(a34)AAa5a4aaaa5 | OPLS-2005 | 9.372 | [*]N1CCCC1C         | -10.871 | -12.058 | -55.815 |
| 61 | DC-61 | A=A1AAAA1a2aaaa(a2)AAa(aa3)a(a34)AAa5a4aaaa5 | OPLS-2005 | 9.125 | CC(C)N([*])C1CC1    | -10.858 | -12.035 | -48.043 |
| 62 | DC-62 | A=A1AAAA1a2aaaa(a2)AAa(aa3)a(a34)AAa5a4aaaa5 | OPLS-2005 | 9.084 | [*]CCC[C@@H](F)C    | -10.846 | -10.940 | -57.378 |
| 63 | DC-63 | A=A1AAAA1a2aaaa(a2)AAa(aa3)a(a34)AAa5a4aaaa5 | OPLS-2005 | 9.121 | [*]CC(N)(CC)CC      | -10.828 | -12.005 | -60.943 |
| 64 | DC-64 | A=A1AAAA1a2aaaa(a2)AAa(aa3)a(a34)AAa5a4aaaa5 | OPLS-2005 | 9.211 | [*]N1CCCC1C#N       | -10.806 | -11.983 | -55.923 |

|    |       |                                             |           |       |                      |         |         |         |
|----|-------|---------------------------------------------|-----------|-------|----------------------|---------|---------|---------|
| 65 | DC-65 | A=A1AAAA1a2aaa(a2)AAa(aa3)a(a34)AAa5a4aaaa5 | OPLS-2005 | 9.046 | [*]c1c(C)cccc1       | -10.795 | -10.882 | -57.258 |
| 66 | DC-66 | A=A1AAAA1a2aaa(a2)AAa(aa3)a(a34)AAa5a4aaaa5 | OPLS-2005 | 9.261 | [*]N(C1)CC1(N)CC     | -10.735 | -12.512 | -65.177 |
| 67 | DC-67 | A=A1AAAA1a2aaa(a2)AAa(aa3)a(a34)AAa5a4aaaa5 | OPLS-2005 | 9.063 | [*]c1ccc(C)n1C       | -10.644 | -10.731 | -54.239 |
| 68 | DC-68 | A=A1AAAA1a2aaa(a2)AAa(aa3)a(a34)AAa5a4aaaa5 | OPLS-2005 | 9.009 | [*]N1CCN(C)CC1       | -10.641 | -11.936 | -62.996 |
| 69 | DC-69 | A=A1AAAA1a2aaa(a2)AAa(aa3)a(a34)AAa5a4aaaa5 | OPLS-2005 | 9.044 | [*]CC(C)C[C@H](C)O   | -10.567 | -10.661 | -54.325 |
| 70 | DC-70 | A=A1AAAA1a2aaa(a2)AAa(aa3)a(a34)AAa5a4aaaa5 | OPLS-2005 | 9.132 | [*]N(C1)CCC1(C)N     | -10.524 | -11.701 | -63.896 |
| 71 | DC-71 | A=A1AAAA1a2aaa(a2)AAa(aa3)a(a34)AAa5a4aaaa5 | OPLS-2005 | 9.170 | [*]N(C1)CC[C@H]1CO   | -10.470 | -11.652 | -64.204 |
| 72 | DC-72 | A=A1AAAA1a2aaa(a2)AAa(aa3)a(a34)AAa5a4aaaa5 | OPLS-2005 | 9.180 | [*]N(C1)CCC1(C)O     | -10.463 | -12.978 | -67.820 |
| 73 | DC-73 | A=A1AAAA1a2aaa(a2)AAa(aa3)a(a34)AAa5a4aaaa5 | OPLS-2005 | 9.057 | [*]N(C1)CC1[C@H](C)O | -10.443 | -10.539 | -58.524 |
| 74 | DC-74 | A=A1AAAA1a2aaa(a2)AAa(aa3)a(a34)AAa5a4aaaa5 | OPLS-2005 | 9.096 | [*]N(C1)CC1(C)CO     | -10.423 | -12.379 | -64.764 |
| 75 | DC-75 | A=A1AAAA1a2aaa(a2)AAa(aa3)a(a34)AAa5a4aaaa5 | OPLS-2005 | 9.193 | [*]N(C1)CCCC1O       | -10.356 | -12.789 | -65.438 |
| 76 | DC-76 | A=A1AAAA1a2aaa(a2)AAa(aa3)a(a34)AAa5a4aaaa5 | OPLS-2005 | 9.143 | [*]N(C1)CC1(F)F      | -10.279 | -11.456 | -55.694 |
| 77 | DC-77 | A=A1AAAA1a2aaa(a2)AAa(aa3)a(a34)AAa5a4aaaa5 | OPLS-2005 | 9.407 | [*]N(C1)CCC1C        | -10.089 | -12.566 | -65.029 |
| 78 | DC-78 | A=A1AAAA1a2aaa(a2)AAa(aa3)a(a34)AAa5a4aaaa5 | OPLS-2005 | 9.033 | [*]N(C1)CC1(F)CN     | -9.950  | -11.573 | -57.012 |
| 79 | DC-79 | A=A1AAAA1a2aaa(a2)AAa(aa3)a(a34)AAa5a4aaaa5 | OPLS-2005 | 9.261 | [*]N(C1)CC1(N)CC     | -9.783  | -12.251 | -59.586 |
| 80 | DC-80 | A=A1AAAA1a2aaa(a2)AAa(aa3)a(a34)AAa5a4aaaa5 | OPLS-2005 | 9.211 | [*]N1CCCC1C#N        | -9.627  | -9.714  | -39.561 |
| 81 | DC-81 | A=A1AAAA1a2aaa(a2)AAa(aa3)a(a34)AAa5a4aaaa5 | OPLS-2005 | 9.228 | CCN([*])C(C)(C)C     | -9.401  | -12.055 | -62.506 |
| 82 | DC-82 | A=A1AAAA1a2aaa(a2)AAa(aa3)a(a34)AAa5a4aaaa5 | OPLS-2005 | 9.279 | [*]N(C1)CC1CCN       | -9.396  | -11.174 | -59.200 |
| 83 | DC-83 | A=A1AAAA1a2aaa(a2)AAa(aa3)a(a34)AAa5a4aaaa5 | OPLS-2005 | 9.115 | [*]N(C1)CC1(C)CN     | -9.334  | -11.003 | -58.611 |
| 84 | DC-84 | A=A1AAAA1a2aaa(a2)AAa(aa3)a(a34)AAa5a4aaaa5 | OPLS-2005 | 9.170 | [*]N(C1)CC[C@H]1CN   | -9.325  | -9.412  | -53.968 |
| 85 | DC-85 | A=A1AAAA1a2aaa(a2)AAa(aa3)a(a34)AAa5a4aaaa5 | OPLS-2005 | 9.261 | [*]N(C1)CC1(N)CC     | -9.322  | -10.782 | -58.587 |
| 86 | DC-86 | A=A1AAAA1a2aaa(a2)AAa(aa3)a(a34)AAa5a4aaaa5 | OPLS-2005 | 9.407 | [*]N(C1)CC1(F)CC     | -9.295  | -10.209 | -39.302 |
| 87 | DC-87 | A=A1AAAA1a2aaa(a2)AAa(aa3)a(a34)AAa5a4aaaa5 | OPLS-2005 | 9.261 | [*]N(C1)CC[C@H]1C#N  | -9.289  | -9.376  | -39.147 |

|     |        |                                              |           |       |                     |        |         |         |
|-----|--------|----------------------------------------------|-----------|-------|---------------------|--------|---------|---------|
| 88  | DC-88  | A=A1AAAA1a2aaaa(a2)AAa(aa3)a(a34)AAa5a4aaaa5 | OPLS-2005 | 9.175 | [*]N1CCC[C@@H]1CN   | -9.271 | -9.358  | -57.009 |
| 89  | DC-89  | A=A1AAAA1a2aaaa(a2)AAa(aa3)a(a34)AAa5a4aaaa5 | OPLS-2005 | 9.223 | [*]N(C1)CC1(O)CC    | -9.249 | -9.336  | -51.888 |
| 90  | DC-90  | A=A1AAAA1a2aaaa(a2)AAa(aa3)a(a34)AAa5a4aaaa5 | OPLS-2005 | 9.487 | [*]N(C1)CCC[C@@H]1C | -9.205 | -9.311  | -55.005 |
| 91  | DC-91  | A=A1AAAA1a2aaaa(a2)AAa(aa3)a(a34)AAa5a4aaaa5 | OPLS-2005 | 9.033 | [*]N(C1)CC1(F)CN    | -9.205 | -11.917 | -61.222 |
| 92  | DC-92  | A=A1AAAA1a2aaaa(a2)AAa(aa3)a(a34)AAa5a4aaaa5 | OPLS-2005 | 9.292 | [*]N1CCCCC1F        | -9.196 | -9.284  | -50.409 |
| 93  | DC-93  | A=A1AAAA1a2aaaa(a2)AAa(aa3)a(a34)AAa5a4aaaa5 | OPLS-2005 | 9.372 | [*]N1CCCC1C         | -9.124 | -11.600 | -54.342 |
| 94  | DC-94  | A=A1AAAA1a2aaaa(a2)AAa(aa3)a(a34)AAa5a4aaaa5 | OPLS-2005 | 9.173 | [*]N(C)C(C)CC       | -9.107 | -11.575 | -61.354 |
| 95  | DC-95  | A=A1AAAA1a2aaaa(a2)AAa(aa3)a(a34)AAa5a4aaaa5 | OPLS-2005 | 9.212 | [*]N(C1)CCC1[NH-]   | -9.043 | -11.572 | -55.816 |
| 96  | DC-96  | A=A1AAAA1a2aaaa(a2)AAa(aa3)a(a34)AAa5a4aaaa5 | OPLS-2005 | 9.154 | [*]CC(C)[C@@H](C)CN | -9.032 | -10.215 | -57.438 |
| 97  | DC-97  | A=A1AAAA1a2aaaa(a2)AAa(aa3)a(a34)AAa5a4aaaa5 | OPLS-2005 | 9.138 | [*]CCC1(F)CNC1      | -8.967 | -10.161 | -53.878 |
| 98  | DC-98  | A=A1AAAA1a2aaaa(a2)AAa(aa3)a(a34)AAa5a4aaaa5 | OPLS-2005 | 9.286 | [*]N(C1)CC1(C)OC    | -8.847 | -10.445 | -59.044 |
| 99  | DC-99  | A=A1AAAA1a2aaaa(a2)AAa(aa3)a(a34)AAa5a4aaaa5 | OPLS-2005 | 9.046 | [*]c1c(C)cccc1      | -8.839 | -10.017 | -55.731 |
| 100 | DC-100 | A=A1AAAA1a2aaaa(a2)AAa(aa3)a(a34)AAa5a4aaaa5 | OPLS-2005 | 9.175 | [*]N1CCC[C@@H]1CN   | -8.807 | -9.985  | -51.940 |
| 101 | DC-101 | A=A1AAAA1a2aaaa(a2)AAa(aa3)a(a34)AAa5a4aaaa5 | OPLS-2005 | 9.513 | [*]N(C1)CC1C(C)C    | -8.799 | -8.886  | -51.634 |
| 102 | DC-102 | A=A1AAAA1a2aaaa(a2)AAa(aa3)a(a34)AAa5a4aaaa5 | OPLS-2005 | 9.261 | [*]N(C1)CC1(N)CC    | -8.724 | -9.094  | -50.694 |
| 103 | DC-103 | A=A1AAAA1a2aaaa(a2)AAa(aa3)a(a34)AAa5a4aaaa5 | OPLS-2005 | 9.092 | [*]N(C1)CC1C        | -8.600 | -11.323 | -47.846 |
| 104 | DC-104 | A=A1AAAA1a2aaaa(a2)AAa(aa3)a(a34)AAa5a4aaaa5 | OPLS-2005 | 9.167 | [*]N(C1)CCC[C@@H]1N | -8.520 | -9.697  | -57.696 |
| 105 | DC-105 | A=A1AAAA1a2aaaa(a2)AAa(aa3)a(a34)AAa5a4aaaa5 | OPLS-2005 | 9.675 | [*]N(C1)CCC1(C)C    | -8.489 | -9.675  | -58.878 |
| 106 | DC-106 | A=A1AAAA1a2aaaa(a2)AAa(aa3)a(a34)AAa5a4aaaa5 | OPLS-2005 | 9.170 | [*]N(C1)CC[C@@H]1CO | -8.485 | -8.578  | -47.879 |
| 107 | DC-107 | A=A1AAAA1a2aaaa(a2)AAa(aa3)a(a34)AAa5a4aaaa5 | OPLS-2005 | 9.059 | [*]CCCC1CNC1        | -8.472 | -8.560  | -48.890 |
| 108 | DC-108 | A=A1AAAA1a2aaaa(a2)AAa(aa3)a(a34)AAa5a4aaaa5 | OPLS-2005 | 9.111 | [*]N(C1)CC1CCO      | -8.437 | -8.533  | -44.661 |
| 109 | DC-109 | A=A1AAAA1a2aaaa(a2)AAa(aa3)a(a34)AAa5a4aaaa5 | OPLS-2005 | 9.187 | [*]CCC(C)CN         | -8.339 | -8.432  | -52.696 |
| 110 | DC-110 | A=A1AAAA1a2aaaa(a2)AAa(aa3)a(a34)AAa5a4aaaa5 | OPLS-2005 | 9.675 | [*]N(C1)CCC1(C)C    | -8.282 | -10.758 | -50.126 |

|     |        |                                              |           |       |                              |        |         |         |
|-----|--------|----------------------------------------------|-----------|-------|------------------------------|--------|---------|---------|
| 111 | DC-111 | A=A1AAAA1a2aaaa(a2)AAa(aa3)a(a34)AAa5a4aaaa5 | OPLS-2005 | 9.279 | [*]N(C1)CC1CCN               | -8.188 | -8.312  | -50.161 |
| 112 | DC-112 | A=A1AAAA1a2aaaa(a2)AAa(aa3)a(a34)AAa5a4aaaa5 | OPLS-2005 | 9.237 | [*]N1CC[C@@H]1CC<br>C        | -8.181 | -8.274  | -39.164 |
| 113 | DC-113 | A=A1AAAA1a2aaaa(a2)AAa(aa3)a(a34)AAa5a4aaaa5 | OPLS-2005 | 9.044 | [*]CC(C)C[C@H](C)O           | -8.147 | -10.792 | -59.728 |
| 114 | DC-114 | A=A1AAAA1a2aaaa(a2)AAa(aa3)a(a34)AAa5a4aaaa5 | OPLS-2005 | 9.618 | [*]N(C1)CC1(C)CC             | -8.111 | -8.203  | -33.524 |
| 115 | DC-115 | A=A1AAAA1a2aaaa(a2)AAa(aa3)a(a34)AAa5a4aaaa5 | OPLS-2005 | 9.115 | [*]N(C1)CC1(C)CN             | -8.090 | -8.668  | -47.445 |
| 116 | DC-116 | A=A1AAAA1a2aaaa(a2)AAa(aa3)a(a34)AAa5a4aaaa5 | OPLS-2005 | 9.017 | [*]CCCC(C)(C)N               | -8.078 | -9.255  | -57.408 |
| 117 | DC-117 | A=A1AAAA1a2aaaa(a2)AAa(aa3)a(a34)AAa5a4aaaa5 | OPLS-2005 | 9.268 | C1CN([*])CCC1F               | -8.069 | -9.246  | -57.391 |
| 118 | DC-118 | A=A1AAAA1a2aaaa(a2)AAa(aa3)a(a34)AAa5a4aaaa5 | OPLS-2005 | 9.023 | [*]N(C1)CC1C#N               | -8.065 | -9.242  | -57.060 |
| 119 | DC-119 | A=A1AAAA1a2aaaa(a2)AAa(aa3)a(a34)AAa5a4aaaa5 | OPLS-2005 | 9.345 | [*]N(C1)CC1(C)C              | -8.058 | -9.241  | -53.814 |
| 120 | DC-120 | A=A1AAAA1a2aaaa(a2)AAa(aa3)a(a34)AAa5a4aaaa5 | OPLS-2005 | 9.017 | [*]CCCC(C)(C)N               | -8.032 | -8.119  | -48.057 |
| 121 | DC-121 | A=A1AAAA1a2aaaa(a2)AAa(aa3)a(a34)AAa5a4aaaa5 | OPLS-2005 | 9.504 | [*]CCCC1CCCC1                | -8.026 | -10.697 | -45.068 |
| 122 | DC-122 | A=A1AAAA1a2aaaa(a2)AAa(aa3)a(a34)AAa5a4aaaa5 | OPLS-2005 | 9.025 | [*]CC(C)(O)CCC               | -8.019 | -10.536 | -58.038 |
| 123 | DC-123 | A=A1AAAA1a2aaaa(a2)AAa(aa3)a(a34)AAa5a4aaaa5 | OPLS-2005 | 9.044 | [*]CC(C)C[C@H](C)O           | -7.960 | -9.144  | -55.218 |
| 124 | DC-124 | A=A1AAAA1a2aaaa(a2)AAa(aa3)a(a34)AAa5a4aaaa5 | OPLS-2005 | 9.040 | [*]CC(O)(CC)CC               | -7.881 | -10.394 | -56.802 |
| 125 | DC-125 | A=A1AAAA1a2aaaa(a2)AAa(aa3)a(a34)AAa5a4aaaa5 | OPLS-2005 | 9.177 | [*]CC[C@@H]1C[C@<br>@H](C1)N | -7.857 | -10.536 | -58.245 |
| 126 | DC-126 | A=A1AAAA1a2aaaa(a2)AAa(aa3)a(a34)AAa5a4aaaa5 | OPLS-2005 | 9.279 | [*]N(C1)CC1CCN               | -7.821 | -9.034  | -53.723 |
| 127 | DC-127 | A=A1AAAA1a2aaaa(a2)AAa(aa3)a(a34)AAa5a4aaaa5 | OPLS-2005 | 9.143 | [*]N(C1)CC1(F)F              | -7.789 | -7.876  | -50.294 |
| 128 | DC-128 | A=A1AAAA1a2aaaa(a2)AAa(aa3)a(a34)AAa5a4aaaa5 | OPLS-2005 | 9.032 | [*]N(C)C1(CN)CC1             | -7.786 | -8.963  | -54.453 |
| 129 | DC-129 | A=A1AAAA1a2aaaa(a2)AAa(aa3)a(a34)AAa5a4aaaa5 | OPLS-2005 | 9.261 | [*]N(C1)CC[C@@H]1<br>C#N     | -7.780 | -8.957  | -54.981 |
| 130 | DC-130 | A=A1AAAA1a2aaaa(a2)AAa(aa3)a(a34)AAa5a4aaaa5 | OPLS-2005 | 9.084 | [*]CCC[C@@H](F)C             | -7.771 | -10.456 | -58.151 |
| 131 | DC-131 | A=A1AAAA1a2aaaa(a2)AAa(aa3)a(a34)AAa5a4aaaa5 | OPLS-2005 | 9.061 | [*]N1CC[C@@H]1CC             | -7.767 | -8.950  | -44.009 |
| 132 | DC-132 | A=A1AAAA1a2aaaa(a2)AAa(aa3)a(a34)AAa5a4aaaa5 | OPLS-2005 | 9.407 | [*]N(C1)CC1(F)CC             | -7.739 | -7.995  | -49.324 |
| 133 | DC-133 | A=A1AAAA1a2aaaa(a2)AAa(aa3)a(a34)AAa5a4aaaa5 | OPLS-2005 | 9.040 | [*]CC(O)(CC)CC               | -7.732 | -8.918  | -52.632 |

|     |        |                                              |           |       |                           |        |        |         |
|-----|--------|----------------------------------------------|-----------|-------|---------------------------|--------|--------|---------|
| 134 | DC-134 | A=A1AAAA1a2aaaa(a2)AAa(aa3)a(a34)AAa5a4aaaa5 | OPLS-2005 | 9.217 | [*]CC(C)(C)CCO            | -7.701 | -8.886 | -52.926 |
| 135 | DC-135 | A=A1AAAA1a2aaaa(a2)AAa(aa3)a(a34)AAa5a4aaaa5 | OPLS-2005 | 9.180 | [*]N(C1)CCC1(C)O          | -7.668 | -8.854 | -52.881 |
| 136 | DC-136 | A=A1AAAA1a2aaaa(a2)AAa(aa3)a(a34)AAa5a4aaaa5 | OPLS-2005 | 9.064 | CC(C)N([*])C(C)C          | -7.609 | -8.793 | -58.191 |
| 137 | DC-137 | A=A1AAAA1a2aaaa(a2)AAa(aa3)a(a34)AAa5a4aaaa5 | OPLS-2005 | 9.021 | [*]CC1(C)[C@H](O)C<br>C1  | -7.585 | -8.769 | -54.037 |
| 138 | DC-138 | A=A1AAAA1a2aaaa(a2)AAa(aa3)a(a34)AAa5a4aaaa5 | OPLS-2005 | 9.192 | [*]N1CCCC1F               | -7.580 | -8.757 | -51.936 |
| 139 | DC-139 | A=A1AAAA1a2aaaa(a2)AAa(aa3)a(a34)AAa5a4aaaa5 | OPLS-2005 | 9.504 | [*]CCC1CCCC1              | -7.562 | -7.656 | -45.210 |
| 140 | DC-140 | A=A1AAAA1a2aaaa(a2)AAa(aa3)a(a34)AAa5a4aaaa5 | OPLS-2005 | 9.422 | [*]N(C1)CCC[C@@H]<br>1F   | -7.561 | -7.648 | -49.841 |
| 141 | DC-141 | A=A1AAAA1a2aaaa(a2)AAa(aa3)a(a34)AAa5a4aaaa5 | OPLS-2005 | 9.268 | C1CN([*])CCC1F            | -7.546 | -7.633 | -48.616 |
| 142 | DC-142 | A=A1AAAA1a2aaaa(a2)AAa(aa3)a(a34)AAa5a4aaaa5 | OPLS-2005 | 9.057 | [*]C[C@@H](C(C)C)N<br>C   | -7.529 | -8.706 | -51.995 |
| 143 | DC-143 | A=A1AAAA1a2aaaa(a2)AAa(aa3)a(a34)AAa5a4aaaa5 | OPLS-2005 | 9.094 | [*]CCC1(O)CCC1            | -7.507 | -7.600 | -46.000 |
| 144 | DC-144 | A=A1AAAA1a2aaaa(a2)AAa(aa3)a(a34)AAa5a4aaaa5 | OPLS-2005 | 9.115 | [*]N(C1)CC1(C)CN          | -7.467 | -8.984 | -52.033 |
| 145 | DC-145 | A=A1AAAA1a2aaaa(a2)AAa(aa3)a(a34)AAa5a4aaaa5 | OPLS-2005 | 9.025 | [*]CC(C)(O)CCC            | -7.464 | -7.560 | -44.591 |
| 146 | DC-146 | A=A1AAAA1a2aaaa(a2)AAa(aa3)a(a34)AAa5a4aaaa5 | OPLS-2005 | 9.389 | [*]N(C1)CC1CCC            | -7.440 | -7.528 | -44.831 |
| 147 | DC-147 | A=A1AAAA1a2aaaa(a2)AAa(aa3)a(a34)AAa5a4aaaa5 | OPLS-2005 | 9.358 | [*]N1CCCC1(C)C            | -7.428 | -8.614 | -57.076 |
| 148 | DC-148 | A=A1AAAA1a2aaaa(a2)AAa(aa3)a(a34)AAa5a4aaaa5 | OPLS-2005 | 9.389 | [*]N(C1)CC1CCC            | -7.427 | -8.604 | -47.589 |
| 149 | DC-149 | A=A1AAAA1a2aaaa(a2)AAa(aa3)a(a34)AAa5a4aaaa5 | OPLS-2005 | 9.358 | [*]N1CCCC1(C)C            | -7.403 | -7.499 | -57.615 |
| 150 | DC-150 | A=A1AAAA1a2aaaa(a2)AAa(aa3)a(a34)AAa5a4aaaa5 | OPLS-2005 | 9.026 | [*]N(C1)CC[C@@H]1<br>O    | -7.401 | -7.488 | -47.172 |
| 151 | DC-151 | A=A1AAAA1a2aaaa(a2)AAa(aa3)a(a34)AAa5a4aaaa5 | OPLS-2005 | 9.123 | [*]CCC(F)(F)F             | -7.389 | -7.477 | -43.366 |
| 152 | DC-152 | A=A1AAAA1a2aaaa(a2)AAa(aa3)a(a34)AAa5a4aaaa5 | OPLS-2005 | 9.515 | [*]N1CCCC1CC              | -7.373 | -7.473 | -50.217 |
| 153 | DC-153 | A=A1AAAA1a2aaaa(a2)AAa(aa3)a(a34)AAa5a4aaaa5 | OPLS-2005 | 9.361 | [*]N(C1)CC1[C@@H](<br>F)C | -7.334 | -8.641 | -50.685 |
| 154 | DC-154 | A=A1AAAA1a2aaaa(a2)AAa(aa3)a(a34)AAa5a4aaaa5 | OPLS-2005 | 9.228 | CCN([*])C(C)(C)C          | -7.321 | -7.415 | -36.097 |
| 155 | DC-155 | A=A1AAAA1a2aaaa(a2)AAa(aa3)a(a34)AAa5a4aaaa5 | OPLS-2005 | 9.170 | [*]N(C1)CC[C@@H]1<br>CN   | -7.277 | -8.455 | -56.161 |
| 156 | DC-156 | A=A1AAAA1a2aaaa(a2)AAa(aa3)a(a34)AAa5a4aaaa5 | OPLS-2005 | 9.255 | [*]N(C1)CC1N(C)C          | -7.268 | -8.579 | -52.390 |

|     |        |                                              |           |       |                        |        |        |         |
|-----|--------|----------------------------------------------|-----------|-------|------------------------|--------|--------|---------|
| 157 | DC-157 | A=A1AAAA1a2aaaa(a2)AAa(aa3)a(a34)AAa5a4aaaa5 | OPLS-2005 | 9.033 | [*]N(C1)CC1(F)CN       | -7.194 | -7.327 | -51.380 |
| 158 | DC-158 | A=A1AAAA1a2aaaa(a2)AAa(aa3)a(a34)AAa5a4aaaa5 | OPLS-2005 | 9.177 | [*]CC[C@H]1C[C@H](C1)N | -7.175 | -7.269 | -40.844 |
| 159 | DC-159 | A=A1AAAA1a2aaaa(a2)AAa(aa3)a(a34)AAa5a4aaaa5 | OPLS-2005 | 9.057 | [*]N(C1)CC1[C@H](C)O   | -7.129 | -8.314 | -53.166 |
| 160 | DC-160 | A=A1AAAA1a2aaaa(a2)AAa(aa3)a(a34)AAa5a4aaaa5 | OPLS-2005 | 9.021 | [*]CC1(C)[C@H](O)CC1   | -7.118 | -7.212 | -51.353 |
| 161 | DC-161 | A=A1AAAA1a2aaaa(a2)AAa(aa3)a(a34)AAa5a4aaaa5 | OPLS-2005 | 9.210 | [*]N(C1)CC1(F)C        | -7.115 | -8.424 | -45.724 |
| 162 | DC-162 | A=A1AAAA1a2aaaa(a2)AAa(aa3)a(a34)AAa5a4aaaa5 | OPLS-2005 | 9.246 | [*]N(C)C(C)(C)CC       | -7.113 | -8.300 | -52.015 |
| 163 | DC-163 | A=A1AAAA1a2aaaa(a2)AAa(aa3)a(a34)AAa5a4aaaa5 | OPLS-2005 | 9.137 | [*]N(C1)CCCC1F         | -7.107 | -7.195 | -46.074 |
| 164 | DC-164 | A=A1AAAA1a2aaaa(a2)AAa(aa3)a(a34)AAa5a4aaaa5 | OPLS-2005 | 9.618 | [*]N(C1)CC1(C)CC       | -7.085 | -8.267 | -48.916 |
| 165 | DC-165 | A=A1AAAA1a2aaaa(a2)AAa(aa3)a(a34)AAa5a4aaaa5 | OPLS-2005 | 9.170 | [*]OC[C@H](C)C1CC1     | -7.075 | -8.252 | -49.673 |
| 166 | DC-166 | A=A1AAAA1a2aaaa(a2)AAa(aa3)a(a34)AAa5a4aaaa5 | OPLS-2005 | 9.323 | [*]N(C1)[C@H](C)C1(C)C | -7.071 | -7.164 | -43.002 |
| 167 | DC-167 | A=A1AAAA1a2aaaa(a2)AAa(aa3)a(a34)AAa5a4aaaa5 | OPLS-2005 | 9.235 | [*]N(C1)CC1CC          | -7.053 | -7.145 | -42.746 |
| 168 | DC-168 | A=A1AAAA1a2aaaa(a2)AAa(aa3)a(a34)AAa5a4aaaa5 | OPLS-2005 | 9.035 | [*]N1CCCC1C            | -7.053 | -9.776 | -39.104 |
| 169 | DC-169 | A=A1AAAA1a2aaaa(a2)AAa(aa3)a(a34)AAa5a4aaaa5 | OPLS-2005 | 9.345 | [*]N(C1)CC1(C)C        | -7.015 | -7.108 | -43.479 |
| 170 | DC-170 | A=A1AAAA1a2aaaa(a2)AAa(aa3)a(a34)AAa5a4aaaa5 | OPLS-2005 | 9.223 | [*]N(C1)CC1(O)CC       | -6.995 | -8.172 | -57.095 |
| 171 | DC-171 | A=A1AAAA1a2aaaa(a2)AAa(aa3)a(a34)AAa5a4aaaa5 | OPLS-2005 | 9.487 | [*]N(C1)CCC[C@H]1C     | -6.920 | -8.116 | -49.340 |
| 172 | DC-172 | A=A1AAAA1a2aaaa(a2)AAa(aa3)a(a34)AAa5a4aaaa5 | OPLS-2005 | 9.228 | CCN([*])C(C)(C)C       | -6.907 | -8.091 | -46.113 |
| 173 | DC-173 | A=A1AAAA1a2aaaa(a2)AAa(aa3)a(a34)AAa5a4aaaa5 | OPLS-2005 | 9.407 | [*]N(C1)CCCC1C         | -6.864 | -6.961 | -45.584 |
| 174 | DC-174 | A=A1AAAA1a2aaaa(a2)AAa(aa3)a(a34)AAa5a4aaaa5 | OPLS-2005 | 9.292 | [*]N1CCCCC1F           | -6.850 | -8.027 | -52.521 |
| 175 | DC-175 | A=A1AAAA1a2aaaa(a2)AAa(aa3)a(a34)AAa5a4aaaa5 | OPLS-2005 | 9.009 | [*]N1CCN(C)CC1         | -6.850 | -7.055 | -44.456 |
| 176 | DC-176 | A=A1AAAA1a2aaaa(a2)AAa(aa3)a(a34)AAa5a4aaaa5 | OPLS-2005 | 9.059 | [*]CCCC1CNC1           | -6.843 | -8.021 | -54.697 |
| 177 | DC-177 | A=A1AAAA1a2aaaa(a2)AAa(aa3)a(a34)AAa5a4aaaa5 | OPLS-2005 | 9.323 | [*]N(C1)[C@H](C)C1(C)C | -6.840 | -8.023 | -46.549 |
| 178 | DC-178 | A=A1AAAA1a2aaaa(a2)AAa(aa3)a(a34)AAa5a4aaaa5 | OPLS-2005 | 9.025 | [*]CC(C)(O)CCC         | -6.837 | -8.023 | -57.744 |
| 179 | DC-179 | A=A1AAAA1a2aaaa(a2)AAa(aa3)a(a34)AAa5a4aaaa5 | OPLS-2005 | 9.237 | [*]N1CC[C@H]1CC1C      | -6.800 | -7.983 | -46.228 |

|     |        |                                              |           |       |                        |        |        |         |
|-----|--------|----------------------------------------------|-----------|-------|------------------------|--------|--------|---------|
| 180 | DC-180 | A=A1AAAA1a2aaaa(a2)AAa(aa3)a(a34)AAa5a4aaaa5 | OPLS-2005 | 9.137 | [*]C[C@H](O)CC(C)C     | -6.800 | -7.983 | -53.704 |
| 181 | DC-181 | A=A1AAAA1a2aaaa(a2)AAa(aa3)a(a34)AAa5a4aaaa5 | OPLS-2005 | 9.175 | [*]CC[C@H]1CCNC1       | -6.799 | -6.891 | -47.316 |
| 182 | DC-182 | A=A1AAAA1a2aaaa(a2)AAa(aa3)a(a34)AAa5a4aaaa5 | OPLS-2005 | 9.286 | [*]N(C1)CC1(C)OC       | -6.724 | -7.233 | -49.074 |
| 183 | DC-183 | A=A1AAAA1a2aaaa(a2)AAa(aa3)a(a34)AAa5a4aaaa5 | OPLS-2005 | 9.092 | [*]N(C1)CC1C           | -6.709 | -7.892 | -43.785 |
| 184 | DC-184 | A=A1AAAA1a2aaaa(a2)AAa(aa3)a(a34)AAa5a4aaaa5 | OPLS-2005 | 9.328 | [*]N(C1)CC1(C#N)C      | -6.684 | -6.772 | -47.497 |
| 185 | DC-185 | A=A1AAAA1a2aaaa(a2)AAa(aa3)a(a34)AAa5a4aaaa5 | OPLS-2005 | 9.329 | [*]CC1(C)C(C)(C)C1     | -6.641 | -7.823 | -55.008 |
| 186 | DC-186 | A=A1AAAA1a2aaaa(a2)AAa(aa3)a(a34)AAa5a4aaaa5 | OPLS-2005 | 9.359 | [*]N(C1)CC[C@H]1CC     | -6.625 | -9.030 | -52.242 |
| 187 | DC-187 | A=A1AAAA1a2aaaa(a2)AAa(aa3)a(a34)AAa5a4aaaa5 | OPLS-2005 | 9.407 | [*]N(C1)CC1(F)CC       | -6.557 | -8.561 | -47.077 |
| 188 | DC-188 | A=A1AAAA1a2aaaa(a2)AAa(aa3)a(a34)AAa5a4aaaa5 | OPLS-2005 | 9.192 | [*]CCCC(C)C            | -6.546 | -7.723 | -50.618 |
| 189 | DC-189 | A=A1AAAA1a2aaaa(a2)AAa(aa3)a(a34)AAa5a4aaaa5 | OPLS-2005 | 9.343 | CCN([*])C1(C)CC1       | -6.515 | -6.602 | -45.372 |
| 190 | DC-190 | A=A1AAAA1a2aaaa(a2)AAa(aa3)a(a34)AAa5a4aaaa5 | OPLS-2005 | 9.515 | [*]N1CCCC1CC           | -6.476 | -7.666 | -54.552 |
| 191 | DC-191 | A=A1AAAA1a2aaaa(a2)AAa(aa3)a(a34)AAa5a4aaaa5 | OPLS-2005 | 9.192 | [*]CCCC(C)C            | -6.464 | -6.551 | -44.360 |
| 192 | DC-192 | A=A1AAAA1a2aaaa(a2)AAa(aa3)a(a34)AAa5a4aaaa5 | OPLS-2005 | 9.055 | C1CN([*])CCC1N         | -6.457 | -7.634 | -53.068 |
| 193 | DC-193 | A=A1AAAA1a2aaaa(a2)AAa(aa3)a(a34)AAa5a4aaaa5 | OPLS-2005 | 9.111 | [*]N(C1)CC1CCO         | -6.453 | -8.974 | -50.114 |
| 194 | DC-194 | A=A1AAAA1a2aaaa(a2)AAa(aa3)a(a34)AAa5a4aaaa5 | OPLS-2005 | 9.361 | [*]N(C1)CC1[C@H](FC)   | -6.425 | -8.567 | -50.055 |
| 195 | DC-195 | A=A1AAAA1a2aaaa(a2)AAa(aa3)a(a34)AAa5a4aaaa5 | OPLS-2005 | 9.255 | [*]N(C1)CC1N(C)C       | -6.378 | -7.471 | -37.006 |
| 196 | DC-196 | A=A1AAAA1a2aaaa(a2)AAa(aa3)a(a34)AAa5a4aaaa5 | OPLS-2005 | 9.255 | [*]N(C1)CC1N(C)C       | -6.377 | -8.707 | -49.751 |
| 197 | DC-197 | A=A1AAAA1a2aaaa(a2)AAa(aa3)a(a34)AAa5a4aaaa5 | OPLS-2005 | 9.235 | [*]N(C1)CC1CC          | -6.374 | -7.556 | -38.016 |
| 198 | DC-198 | A=A1AAAA1a2aaaa(a2)AAa(aa3)a(a34)AAa5a4aaaa5 | OPLS-2005 | 9.323 | [*]N(C1)[C@H](C)C1(C)C | -6.369 | -9.091 | -53.860 |
| 199 | DC-199 | A=A1AAAA1a2aaaa(a2)AAa(aa3)a(a34)AAa5a4aaaa5 | OPLS-2005 | 9.208 | [*]N1CCCC1CO           | -6.352 | -7.529 | -53.420 |
| 200 | DC-200 | A=A1AAAA1a2aaaa(a2)AAa(aa3)a(a34)AAa5a4aaaa5 | OPLS-2005 | 9.063 | [*]c1ccc(C)n1C         | -6.230 | -7.407 | -54.034 |
| 201 | DC-201 | A=A1AAAA1a2aaaa(a2)AAa(aa3)a(a34)AAa5a4aaaa5 | OPLS-2005 | 9.291 | [*]CC(C)CCC            | -6.166 | -7.350 | -53.424 |
| 202 | DC-202 | A=A1AAAA1a2aaaa(a2)AAa(aa3)a(a34)AAa5a4aaaa5 | OPLS-2005 | 9.068 | [*]N(C)C1(C)CCC1       | -6.116 | -7.308 | -40.607 |

|     |        |                                              |           |       |                          |        |        |         |
|-----|--------|----------------------------------------------|-----------|-------|--------------------------|--------|--------|---------|
| 203 | DC-203 | A=A1AAAA1a2aaaa(a2)AAa(aa3)a(a34)AAa5a4aaaa5 | OPLS-2005 | 9.513 | [*]N(C1)CC1C(C)C         | -6.078 | -7.255 | -45.552 |
| 204 | DC-204 | A=A1AAAA1a2aaaa(a2)AAa(aa3)a(a34)AAa5a4aaaa5 | OPLS-2005 | 9.138 | [*]CCCC(F)CNC1           | -6.009 | -6.114 | -40.800 |
| 205 | DC-205 | A=A1AAAA1a2aaaa(a2)AAa(aa3)a(a34)AAa5a4aaaa5 | OPLS-2005 | 9.286 | [*]N(C1)CC1(C)OC         | -5.939 | -7.517 | -40.598 |
| 206 | DC-206 | A=A1AAAA1a2aaaa(a2)AAa(aa3)a(a34)AAa5a4aaaa5 | OPLS-2005 | 9.215 | [*]N(C1)CC[C@@H]1OC      | -5.918 | -6.005 | -22.978 |
| 207 | DC-207 | A=A1AAAA1a2aaaa(a2)AAa(aa3)a(a34)AAa5a4aaaa5 | OPLS-2005 | 9.137 | [*]C[C@H](O)CC(C)C       | -5.858 | -5.950 | -36.057 |
| 208 | DC-208 | A=A1AAAA1a2aaaa(a2)AAa(aa3)a(a34)AAa5a4aaaa5 | OPLS-2005 | 9.193 | [*]N(C1)CCCC1O           | -5.633 | -6.820 | -45.382 |
| 209 | DC-209 | A=A1AAAA1a2aaaa(a2)AAa(aa3)a(a34)AAa5a4aaaa5 | OPLS-2005 | 9.255 | [*]N(C1)CC1N(C)C         | -5.602 | -5.823 | -42.692 |
| 210 | DC-210 | A=A1AAAA1a2aaaa(a2)AAa(aa3)a(a34)AAa5a4aaaa5 | OPLS-2005 | 9.255 | [*]N(C1)CC1N(C)C         | -5.433 | -7.616 | -47.453 |
| 211 | DC-211 | A=A1AAAA1a2aaaa(a2)AAa(aa3)a(a34)AAa5a4aaaa5 | OPLS-2005 | 9.175 | [*]CC[C@H]1CCNC1         | -5.334 | -6.517 | -52.457 |
| 212 | DC-212 | A=A1AAAA1a2aaaa(a2)AAa(aa3)a(a34)AAa5a4aaaa5 | OPLS-2005 | 9.021 | [*]CC1(C)[C@H](O)CC1     | -5.332 | -7.994 | -47.483 |
| 213 | DC-213 | A=A1AAAA1a2aaaa(a2)AAa(aa3)a(a34)AAa5a4aaaa5 | OPLS-2005 | 9.096 | [*]N(C1)CC1(C)CO         | -5.295 | -5.405 | -44.363 |
| 214 | DC-214 | A=A1AAAA1a2aaaa(a2)AAa(aa3)a(a34)AAa5a4aaaa5 | OPLS-2005 | 9.009 | [*]N1CCN(C)CC1           | -5.294 | -6.397 | -38.575 |
| 215 | DC-215 | A=A1AAAA1a2aaaa(a2)AAa(aa3)a(a34)AAa5a4aaaa5 | OPLS-2005 | 9.118 | [*]NCC1(F)CCC1           | -5.285 | -7.775 | -49.254 |
| 216 | DC-216 | A=A1AAAA1a2aaaa(a2)AAa(aa3)a(a34)AAa5a4aaaa5 | OPLS-2005 | 9.171 | O1CCN([*])C[C@@H]1C      | -5.236 | -6.413 | -52.765 |
| 217 | DC-217 | A=A1AAAA1a2aaaa(a2)AAa(aa3)a(a34)AAa5a4aaaa5 | OPLS-2005 | 9.177 | [*]CC[C@@H]1C[C@@H](C1)N | -5.233 | -6.417 | -42.962 |
| 218 | DC-218 | A=A1AAAA1a2aaaa(a2)AAa(aa3)a(a34)AAa5a4aaaa5 | OPLS-2005 | 9.345 | [*]N(C1)CC1(C)C          | -5.101 | -7.824 | -47.170 |
| 219 | DC-219 | A=A1AAAA1a2aaaa(a2)AAa(aa3)a(a34)AAa5a4aaaa5 | OPLS-2005 | 9.515 | [*]N1CCCC1CC             | -5.085 | -7.362 | -47.161 |
| 220 | DC-220 | A=A1AAAA1a2aaaa(a2)AAa(aa3)a(a34)AAa5a4aaaa5 | OPLS-2005 | 9.372 | [*]N1CCCC1C              | -5.036 | -5.132 | -33.415 |
| 221 | DC-221 | A=A1AAAA1a2aaaa(a2)AAa(aa3)a(a34)AAa5a4aaaa5 | OPLS-2005 | 9.210 | [*]N(C1)CC1(F)C          | -4.973 | -7.103 | -47.146 |
| 222 | DC-222 | A=A1AAAA1a2aaaa(a2)AAa(aa3)a(a34)AAa5a4aaaa5 | OPLS-2005 | 9.343 | CCN([*])C1(C)CC1         | -4.694 | -5.871 | -40.636 |
| 223 | DC-223 | A=A1AAAA1a2aaaa(a2)AAa(aa3)a(a34)AAa5a4aaaa5 | OPLS-2005 | 9.138 | [*]CCCC(F)CNC1           | -3.971 | -6.291 | -38.024 |
| 224 | DC-224 | A=A1AAAA1a2aaaa(a2)AAa(aa3)a(a34)AAa5a4aaaa5 | OPLS-2005 | 9.057 | [*]N(C1)CC1[C@H](C)O     | -3.874 | -6.403 | -43.889 |
| 225 | DC-225 | A=A1AAAA1a2aaaa(a2)AAa(aa3)a(a34)AAa5a4aaaa5 | OPLS-2005 | 9.217 | [*]CC(C)(C)CCO           | -3.735 | -6.341 | -42.174 |

|     |        |                                             |           |       |                   |        |        |         |
|-----|--------|---------------------------------------------|-----------|-------|-------------------|--------|--------|---------|
| 226 | DC-226 | A=A1AAAA1a2aaa(a2)AAa(aa3)a(a34)AAa5a4aaaa5 | OPLS-2005 | 9.291 | [*]CC(C)CCC       | -3.528 | -6.172 | -39.683 |
| 227 | DC-227 | A=A1AAAA1a2aaa(a2)AAa(aa3)a(a34)AAa5a4aaaa5 | OPLS-2005 | 9.358 | [*]N1CCCC1(C)C    | -2.840 | -5.316 | -34.975 |
| 228 | DC-228 | A=A1AAAA1a2aaa(a2)AAa(aa3)a(a34)AAa5a4aaaa5 | OPLS-2005 | 9.328 | [*]N(C1)CC1(C#N)C | -2.788 | -3.966 | -36.273 |
| 229 | DC-229 | A=A1AAAA1a2aaa(a2)AAa(aa3)a(a34)AAa5a4aaaa5 | OPLS-2005 | 9.068 | [*]N(C)C1(C)CCC1  | -2.636 | -4.843 | -37.445 |

Table S4B: The molecular docking results for 371 designed compounds using Glide package in Schrodinger suite. All the compounds are aligned based on the docking results and functional group modifications at 6<sup>th</sup> position of Pyrimidine moiety especially in hydrophobic and steric nature.

| S.NO | Designed Compounds | Core SMARTS                                 | Force Field | Predicted Activity 7 | R-Group Modification | Docking Score<br>kcal/mol | Glide Score<br>kcal/mol | Glide Energy<br>kcal/mol |
|------|--------------------|---------------------------------------------|-------------|----------------------|----------------------|---------------------------|-------------------------|--------------------------|
| 1    | DC-230             | A=A1AAAA1a2aaa(a2)AAa(aa3)a(a34)AAa5a4aaaa5 | OPLS-2005   | 9.023                | [*]CNC1(CN)CC1       | -10.008                   | -10.127                 | -57.480                  |
| 2    | DC-231             | A=A1AAAA1a2aaa(a2)AAa(aa3)a(a34)AAa5a4aaaa5 | OPLS-2005   | 9.065                | [*]N(C1)CC1CN        | -9.768                    | -10.052                 | -56.382                  |
| 3    | DC-232             | A=A1AAAA1a2aaa(a2)AAa(aa3)a(a34)AAa5a4aaaa5 | OPLS-2005   | 9.031                | [*]CN(C)CC(C)O       | -9.733                    | -9.951                  | -58.377                  |
| 4    | DC-233             | A=A1AAAA1a2aaa(a2)AAa(aa3)a(a34)AAa5a4aaaa5 | OPLS-2005   | 9.115                | [*]N(C1)CC1(O)CC     | -9.682                    | -10.050                 | -51.031                  |
| 5    | DC-234             | A=A1AAAA1a2aaa(a2)AAa(aa3)a(a34)AAa5a4aaaa5 | OPLS-2005   | 9.148                | [*]OC1(CC)COC1       | -9.276                    | -9.403                  | -51.702                  |
| 6    | DC-235             | A=A1AAAA1a2aaa(a2)AAa(aa3)a(a34)AAa5a4aaaa5 | OPLS-2005   | 9.103                | [*]CC1(CN)CCC1       | -9.264                    | -9.387                  | -54.858                  |
| 7    | DC-236             | A=A1AAAA1a2aaa(a2)AAa(aa3)a(a34)AAa5a4aaaa5 | OPLS-2005   | 9.262                | C1CN([*])CCC1N       | -9.255                    | -9.465                  | -54.710                  |
| 8    | DC-237             | A=A1AAAA1a2aaa(a2)AAa(aa3)a(a34)AAa5a4aaaa5 | OPLS-2005   | 9.055                | [*]CC1(N)CCOC1       | -9.190                    | -10.397                 | -57.609                  |
| 9    | DC-238             | A=A1AAAA1a2aaa(a2)AAa(aa3)a(a34)AAa5a4aaaa5 | OPLS-2005   | 9.086                | [*]CC(F)(C)CN        | -9.176                    | -9.311                  | -54.866                  |
| 10   | DC-239             | A=A1AAAA1a2aaa(a2)AAa(aa3)a(a34)AAa5a4aaaa5 | OPLS-2005   | 9.150                | [*]c1c(C)csc1        | -9.111                    | -9.217                  | -42.262                  |
| 11   | DC-240             | A=A1AAAA1a2aaa(a2)AAa(aa3)a(a34)AAa5a4aaaa5 | OPLS-2005   | 9.342                | [*]N(C)C(C)CN        | -9.055                    | -9.339                  | -55.444                  |
| 12   | DC-241             | A=A1AAAA1a2aaa(a2)AAa(aa3)a(a34)AAa5a4aaaa5 | OPLS-2005   | 9.202                | [*]N1CC[C@@H]1CN     | -9.041                    | -9.277                  | -50.074                  |

|    |        |                                              |           |       |                      |        |         |         |
|----|--------|----------------------------------------------|-----------|-------|----------------------|--------|---------|---------|
|    |        | a5a4aaaa5                                    |           |       |                      |        |         |         |
| 13 | DC-242 | A=A1AAAA1a2aaaa(a2)AAa(aa3)a(a34)AAa5a4aaaa5 | OPLS-2005 | 9.102 | [*]OC1([C@H](C)N)CC1 | -9.041 | -9.543  | -56.119 |
| 14 | DC-243 | A=A1AAAA1a2aaaa(a2)AAa(aa3)a(a34)AAa5a4aaaa5 | OPLS-2005 | 9.004 | [*]OC(C)CCN          | -9.018 | -9.847  | -54.211 |
| 15 | DC-244 | A=A1AAAA1a2aaaa(a2)AAa(aa3)a(a34)AAa5a4aaaa5 | OPLS-2005 | 9.026 | [*]CC(F)(C)CO        | -8.975 | -9.172  | -39.046 |
| 16 | DC-245 | A=A1AAAA1a2aaaa(a2)AAa(aa3)a(a34)AAa5a4aaaa5 | OPLS-2005 | 9.001 | [*]OCCCC1(N)CC1      | -8.906 | -9.252  | -52.535 |
| 17 | DC-246 | A=A1AAAA1a2aaaa(a2)AAa(aa3)a(a34)AAa5a4aaaa5 | OPLS-2005 | 9.166 | [*]c1c(C)ncnc1       | -8.901 | -8.988  | -55.187 |
| 18 | DC-247 | A=A1AAAA1a2aaaa(a2)AAa(aa3)a(a34)AAa5a4aaaa5 | OPLS-2005 | 9.166 | [*]N1CCCC1C          | -8.857 | -11.515 | -52.982 |
| 19 | DC-248 | A=A1AAAA1a2aaaa(a2)AAa(aa3)a(a34)AAa5a4aaaa5 | OPLS-2005 | 9.147 | [*]c1c(C)scc1        | -8.828 | -8.934  | -51.976 |
| 20 | DC-249 | A=A1AAAA1a2aaaa(a2)AAa(aa3)a(a34)AAa5a4aaaa5 | OPLS-2005 | 9.086 | [*]CC(F)(C)CN        | -8.797 | -10.022 | -58.299 |
| 21 | DC-250 | A=A1AAAA1a2aaaa(a2)AAa(aa3)a(a34)AAa5a4aaaa5 | OPLS-2005 | 9.102 | [*]OC1([C@H](C)N)CC1 | -8.739 | -9.961  | -55.325 |
| 22 | DC-251 | A=A1AAAA1a2aaaa(a2)AAa(aa3)a(a34)AAa5a4aaaa5 | OPLS-2005 | 9.090 | [*]CC(N)C(C)(C)O     | -8.732 | -8.885  | -53.584 |
| 23 | DC-252 | A=A1AAAA1a2aaaa(a2)AAa(aa3)a(a34)AAa5a4aaaa5 | OPLS-2005 | 9.031 | [*]n(c1)ccc1C#N      | -8.655 | -8.742  | -40.003 |
| 24 | DC-253 | A=A1AAAA1a2aaaa(a2)AAa(aa3)a(a34)AAa5a4aaaa5 | OPLS-2005 | 9.101 | [*]c1c(O)nncc1       | -8.652 | -8.755  | -38.111 |
| 25 | DC-254 | A=A1AAAA1a2aaaa(a2)AAa(aa3)a(a34)AAa5a4aaaa5 | OPLS-2005 | 9.103 | [*]CC1(CN)CCC1       | -8.649 | -9.859  | -58.966 |
| 26 | DC-255 | A=A1AAAA1a2aaaa(a2)AAa(aa3)a(a34)AAa5a4aaaa5 | OPLS-2005 | 9.203 | [*]OC(C)(CC)CN       | -8.613 | -9.101  | -53.103 |
| 27 | DC-256 | A=A1AAAA1a2aaaa(a2)AAa(aa3)a(a34)AAa5a4aaaa5 | OPLS-2005 | 9.131 | [*]c1cc(N)ncc1       | -8.612 | -8.708  | -38.435 |
| 28 | DC-257 | A=A1AAAA1a2aaaa(a2)AAa(aa3)a(a34)AAa5a4aaaa5 | OPLS-2005 | 9.204 | [*]N(C1)CC[C@@H]1CN  | -8.586 | -8.802  | -40.928 |
| 29 | DC-258 | A=A1AAAA1a2aaaa(a2)AAa(aa3)a(a34)AAa5a4aaaa5 | OPLS-2005 | 9.066 | [*]OCC1(C)CCC1       | -8.575 | -9.598  | -55.196 |
| 30 | DC-259 | A=A1AAAA1a2aaaa(a2)AAa(aa3)a(a34)AAa5a4aaaa5 | OPLS-2005 | 9.096 | [*]CC1(C(C)N)CC1     | -8.546 | -9.751  | -56.081 |
| 31 | DC-260 | A=A1AAAA1a2aaaa(a2)AAa(aa3)a(a34)AAa5a4aaaa5 | OPLS-2005 | 9.123 | [*]CC1(NC)CCC1       | -8.526 | -9.703  | -56.736 |
| 32 | DC-261 | A=A1AAAA1a2aaaa(a2)AAa(aa3)a(a34)AAa5a4aaaa5 | OPLS-2005 | 9.028 | [*]CC(C)CNC          | -8.520 | -8.632  | -33.223 |
| 33 | DC-262 | A=A1AAAA1a2aaaa(a2)AAa(aa3)a(a34)AAa5a4aaaa5 | OPLS-2005 | 9.096 | [*]CC1(C(C)N)CC1     | -8.474 | -8.589  | -45.740 |
| 34 | DC-263 | A=A1AAAA1a2aaaa(a2)AAa(aa3)a(a34)AAa5a4aaaa5 | OPLS-2005 | 9.149 | [*]CC(C)(CN)CO       | -8.471 | -8.609  | -51.124 |

|    |        |                                              |           |       |                       |        |        |         |
|----|--------|----------------------------------------------|-----------|-------|-----------------------|--------|--------|---------|
| 35 | DC-264 | A=A1AAAA1a2aaaa(a2)AAa(aa3)a(a34)AAa5a4aaaa5 | OPLS-2005 | 9.261 | [*]c1c(C)ccn1C        | -8.461 | -8.557 | -49.260 |
| 36 | DC-265 | A=A1AAAA1a2aaaa(a2)AAa(aa3)a(a34)AAa5a4aaaa5 | OPLS-2005 | 9.229 | [*]c1cccn1CC          | -8.430 | -8.527 | -50.035 |
| 37 | DC-266 | A=A1AAAA1a2aaaa(a2)AAa(aa3)a(a34)AAa5a4aaaa5 | OPLS-2005 | 9.224 | [*]n1c(C)ncc1C        | -8.425 | -9.628 | -58.083 |
| 38 | DC-267 | A=A1AAAA1a2aaaa(a2)AAa(aa3)a(a34)AAa5a4aaaa5 | OPLS-2005 | 9.091 | [*]c1c(CO)[nH]nc1     | -8.422 | -9.609 | -52.300 |
| 39 | DC-268 | A=A1AAAA1a2aaaa(a2)AAa(aa3)a(a34)AAa5a4aaaa5 | OPLS-2005 | 9.394 | [*]N1CCCC1CC          | -8.411 | -8.696 | -46.282 |
| 40 | DC-269 | A=A1AAAA1a2aaaa(a2)AAa(aa3)a(a34)AAa5a4aaaa5 | OPLS-2005 | 9.064 | [*]c1c(O)sccl         | -8.381 | -8.707 | -43.912 |
| 41 | DC-270 | A=A1AAAA1a2aaaa(a2)AAa(aa3)a(a34)AAa5a4aaaa5 | OPLS-2005 | 9.128 | [*]N1CCCC1CCO         | -8.362 | -9.345 | -51.611 |
| 42 | DC-271 | A=A1AAAA1a2aaaa(a2)AAa(aa3)a(a34)AAa5a4aaaa5 | OPLS-2005 | 9.261 | [*]c1c(C)ccn1C        | -8.346 | -9.533 | -56.363 |
| 43 | DC-272 | A=A1AAAA1a2aaaa(a2)AAa(aa3)a(a34)AAa5a4aaaa5 | OPLS-2005 | 9.039 | [*]CC1(O)CCC1         | -8.302 | -8.661 | -51.540 |
| 44 | DC-273 | A=A1AAAA1a2aaaa(a2)AAa(aa3)a(a34)AAa5a4aaaa5 | OPLS-2005 | 9.214 | [*]c1c(F)cccc1        | -8.272 | -8.367 | -40.669 |
| 45 | DC-274 | A=A1AAAA1a2aaaa(a2)AAa(aa3)a(a34)AAa5a4aaaa5 | OPLS-2005 | 9.008 | [*]CC(C)NC            | -8.246 | -8.333 | -37.878 |
| 46 | DC-275 | A=A1AAAA1a2aaaa(a2)AAa(aa3)a(a34)AAa5a4aaaa5 | OPLS-2005 | 9.188 | [*]c1cc(N)ccc1        | -8.237 | -8.335 | -28.615 |
| 47 | DC-276 | A=A1AAAA1a2aaaa(a2)AAa(aa3)a(a34)AAa5a4aaaa5 | OPLS-2005 | 9.148 | [*]CC(C)(CN)NC        | -8.214 | -8.891 | -54.646 |
| 48 | DC-277 | A=A1AAAA1a2aaaa(a2)AAa(aa3)a(a34)AAa5a4aaaa5 | OPLS-2005 | 9.090 | [*]O[C@@H](C)C1CCC1   | -8.116 | -8.271 | -46.670 |
| 49 | DC-278 | A=A1AAAA1a2aaaa(a2)AAa(aa3)a(a34)AAa5a4aaaa5 | OPLS-2005 | 9.068 | [*]N(C1)CC1C          | -8.109 | -8.471 | -47.722 |
| 50 | DC-279 | A=A1AAAA1a2aaaa(a2)AAa(aa3)a(a34)AAa5a4aaaa5 | OPLS-2005 | 9.182 | [*]CC(C)(O)C(C)C      | -8.047 | -8.406 | -55.340 |
| 51 | DC-280 | A=A1AAAA1a2aaaa(a2)AAa(aa3)a(a34)AAa5a4aaaa5 | OPLS-2005 | 9.037 | [*]n1cccc1O           | -8.005 | -8.207 | -51.616 |
| 52 | DC-281 | A=A1AAAA1a2aaaa(a2)AAa(aa3)a(a34)AAa5a4aaaa5 | OPLS-2005 | 9.003 | [*]NC1(C)CC(C1)O      | -7.961 | -8.334 | -50.180 |
| 53 | DC-282 | A=A1AAAA1a2aaaa(a2)AAa(aa3)a(a34)AAa5a4aaaa5 | OPLS-2005 | 9.193 | [*]N1C[C@@H](O)C1(C)C | -7.946 | -8.918 | -37.085 |
| 54 | DC-283 | A=A1AAAA1a2aaaa(a2)AAa(aa3)a(a34)AAa5a4aaaa5 | OPLS-2005 | 9.247 | [*]N(C)C1(C)CC1       | -7.929 | -8.264 | -45.671 |
| 55 | DC-284 | A=A1AAAA1a2aaaa(a2)AAa(aa3)a(a34)AAa5a4aaaa5 | OPLS-2005 | 9.055 | [*]N(C)C1CC1          | -7.911 | -9.343 | -54.757 |
| 56 | DC-285 | A=A1AAAA1a2aaaa(a2)AAa(aa3)a(a34)AAa5a4aaaa5 | OPLS-2005 | 9.149 | [*]NC1(C(C)C)CC1      | -7.881 | -8.764 | -50.196 |
| 57 | DC-286 | A=A1AAAA1a2aaaa(a2)AAa(aa3)a(a34)AAa5a4aaaa5 | OPLS-2005 | 9.021 | [*]N(C)CC1CCC1        | -7.877 | -8.955 | -36.989 |

|    |        |                                              |           |       |                      |        |         |         |
|----|--------|----------------------------------------------|-----------|-------|----------------------|--------|---------|---------|
| 58 | DC-287 | A=A1AAAA1a2aaaa(a2)AAa(aa3)a(a34)AAa5a4aaaa5 | OPLS-2005 | 9.043 | [*]c1c(O)n(C)cc1     | -7.844 | -9.043  | -35.405 |
| 59 | DC-288 | A=A1AAAA1a2aaaa(a2)AAa(aa3)a(a34)AAa5a4aaaa5 | OPLS-2005 | 9.255 | [*]N(C)C(C)CC        | -7.826 | -9.269  | -48.030 |
| 60 | DC-289 | A=A1AAAA1a2aaaa(a2)AAa(aa3)a(a34)AAa5a4aaaa5 | OPLS-2005 | 9.149 | [*]CC(C)(CN)CO       | -7.823 | -9.049  | -52.099 |
| 61 | DC-290 | A=A1AAAA1a2aaaa(a2)AAa(aa3)a(a34)AAa5a4aaaa5 | OPLS-2005 | 9.202 | [*]N1CC[C@@H]1CN     | -7.817 | -9.143  | -52.387 |
| 62 | DC-291 | A=A1AAAA1a2aaaa(a2)AAa(aa3)a(a34)AAa5a4aaaa5 | OPLS-2005 | 9.260 | [*]OC(C)(C)C(C)N     | -7.787 | -8.439  | -53.560 |
| 63 | DC-292 | A=A1AAAA1a2aaaa(a2)AAa(aa3)a(a34)AAa5a4aaaa5 | OPLS-2005 | 9.132 | [*]c1cccc(n1)O       | -7.777 | -7.864  | -40.766 |
| 64 | DC-293 | A=A1AAAA1a2aaaa(a2)AAa(aa3)a(a34)AAa5a4aaaa5 | OPLS-2005 | 9.184 | [*]N(C)[C@H](C)C1CC1 | -7.756 | -8.148  | -50.459 |
| 65 | DC-294 | A=A1AAAA1a2aaaa(a2)AAa(aa3)a(a34)AAa5a4aaaa5 | OPLS-2005 | 9.136 | [*]c1cnc(C)n1C       | -7.744 | -9.636  | -40.706 |
| 66 | DC-295 | A=A1AAAA1a2aaaa(a2)AAa(aa3)a(a34)AAa5a4aaaa5 | OPLS-2005 | 9.023 | [*]CC(C)(O)CCN       | -7.737 | -9.535  | -54.292 |
| 67 | DC-296 | A=A1AAAA1a2aaaa(a2)AAa(aa3)a(a34)AAa5a4aaaa5 | OPLS-2005 | 9.150 | [*]c1c(C)csc1        | -7.698 | -8.894  | -52.470 |
| 68 | DC-297 | A=A1AAAA1a2aaaa(a2)AAa(aa3)a(a34)AAa5a4aaaa5 | OPLS-2005 | 9.209 | [*]N(C1)CC[C@@H]1OC  | -7.661 | -10.361 | -35.674 |
| 69 | DC-298 | A=A1AAAA1a2aaaa(a2)AAa(aa3)a(a34)AAa5a4aaaa5 | OPLS-2005 | 9.076 | [*]N(C1)CC1CCN       | -7.655 | -10.026 | -56.002 |
| 70 | DC-299 | A=A1AAAA1a2aaaa(a2)AAa(aa3)a(a34)AAa5a4aaaa5 | OPLS-2005 | 9.146 | [*]c1cccn1C          | -7.634 | -8.820  | -53.870 |
| 71 | DC-300 | A=A1AAAA1a2aaaa(a2)AAa(aa3)a(a34)AAa5a4aaaa5 | OPLS-2005 | 9.039 | [*]CC1(O)CCC1        | -7.619 | -9.359  | -52.821 |
| 72 | DC-301 | A=A1AAAA1a2aaaa(a2)AAa(aa3)a(a34)AAa5a4aaaa5 | OPLS-2005 | 9.157 | [*]CC(C)(CN)OC       | -7.613 | -8.851  | -53.944 |
| 73 | DC-302 | A=A1AAAA1a2aaaa(a2)AAa(aa3)a(a34)AAa5a4aaaa5 | OPLS-2005 | 9.367 | [*]N(C)C(C)(C)CN     | -7.599 | -7.868  | -49.093 |
| 74 | DC-303 | A=A1AAAA1a2aaaa(a2)AAa(aa3)a(a34)AAa5a4aaaa5 | OPLS-2005 | 9.220 | [*]OC(C(C)C)CN       | -7.590 | -8.881  | -48.005 |
| 75 | DC-304 | A=A1AAAA1a2aaaa(a2)AAa(aa3)a(a34)AAa5a4aaaa5 | OPLS-2005 | 9.103 | [*]CC1(CN)CCC1       | -7.577 | -9.354  | -52.727 |
| 76 | DC-305 | A=A1AAAA1a2aaaa(a2)AAa(aa3)a(a34)AAa5a4aaaa5 | OPLS-2005 | 9.036 | [*]NC1(C)CCC1        | -7.562 | -9.627  | -53.544 |
| 77 | DC-306 | A=A1AAAA1a2aaaa(a2)AAa(aa3)a(a34)AAa5a4aaaa5 | OPLS-2005 | 9.023 | [*]CC(C)(O)CCN       | -7.548 | -8.653  | -44.385 |
| 78 | DC-307 | A=A1AAAA1a2aaaa(a2)AAa(aa3)a(a34)AAa5a4aaaa5 | OPLS-2005 | 9.152 | [*]c1c(C)c[nH]c1     | -7.532 | -8.719  | -38.642 |
| 79 | DC-308 | A=A1AAAA1a2aaaa(a2)AAa(aa3)a(a34)AAa5a4aaaa5 | OPLS-2005 | 9.230 | O1CCN([*])C[C@@H]1C  | -7.526 | -7.640  | -12.461 |
| 80 | DC-309 | A=A1AAAA1a2aaaa(a2)AAa(aa3)a(a34)AAa5a4aaaa5 | OPLS-2005 | 9.254 | [*]c1c(C)nccc1       | -7.509 | -8.693  | -36.433 |

|     |        |                                              |           |       |                      |        |        |         |
|-----|--------|----------------------------------------------|-----------|-------|----------------------|--------|--------|---------|
| 81  | DC-310 | A=A1AAAA1a2aaaa(a2)AAa(aa3)a(a34)AAa5a4aaaa5 | OPLS-2005 | 9.158 | [*]N(C)CC(C)(C)O     | -7.496 | -8.398 | -51.406 |
| 82  | DC-311 | A=A1AAAA1a2aaaa(a2)AAa(aa3)a(a34)AAa5a4aaaa5 | OPLS-2005 | 9.096 | [*]NC1(CC1)CCC       | -7.421 | -8.880 | -50.871 |
| 83  | DC-312 | A=A1AAAA1a2aaaa(a2)AAa(aa3)a(a34)AAa5a4aaaa5 | OPLS-2005 | 9.055 | [*]N(C)C1CC1         | -7.417 | -7.765 | -43.032 |
| 84  | DC-313 | A=A1AAAA1a2aaaa(a2)AAa(aa3)a(a34)AAa5a4aaaa5 | OPLS-2005 | 9.155 | CCN([*])CC           | -7.415 | -7.716 | -35.843 |
| 85  | DC-314 | A=A1AAAA1a2aaaa(a2)AAa(aa3)a(a34)AAa5a4aaaa5 | OPLS-2005 | 9.011 | [*]CC1(C)C(C1)N      | -7.393 | -8.631 | -53.638 |
| 86  | DC-315 | A=A1AAAA1a2aaaa(a2)AAa(aa3)a(a34)AAa5a4aaaa5 | OPLS-2005 | 9.001 | [*]OC(C)CC1CC1       | -7.378 | -8.632 | -51.010 |
| 87  | DC-316 | A=A1AAAA1a2aaaa(a2)AAa(aa3)a(a34)AAa5a4aaaa5 | OPLS-2005 | 9.253 | [*]N(C)CC1(N)CC1     | -7.371 | -8.269 | -53.104 |
| 88  | DC-317 | A=A1AAAA1a2aaaa(a2)AAa(aa3)a(a34)AAa5a4aaaa5 | OPLS-2005 | 9.096 | [*]c1c(C)[nH]cn1     | -7.362 | -8.714 | -39.428 |
| 89  | DC-318 | A=A1AAAA1a2aaaa(a2)AAa(aa3)a(a34)AAa5a4aaaa5 | OPLS-2005 | 9.055 | [*]N(C)C1CC1         | -7.361 | -8.265 | -45.961 |
| 90  | DC-319 | A=A1AAAA1a2aaaa(a2)AAa(aa3)a(a34)AAa5a4aaaa5 | OPLS-2005 | 9.174 | [*]NC(C)(C)CCC       | -7.342 | -8.294 | -48.719 |
| 91  | DC-320 | A=A1AAAA1a2aaaa(a2)AAa(aa3)a(a34)AAa5a4aaaa5 | OPLS-2005 | 9.139 | [*]N(C)C1CCC1        | -7.337 | -7.733 | -42.572 |
| 92  | DC-321 | A=A1AAAA1a2aaaa(a2)AAa(aa3)a(a34)AAa5a4aaaa5 | OPLS-2005 | 9.148 | [*]CC(C)(CN)NC       | -7.335 | -9.082 | -53.135 |
| 93  | DC-322 | A=A1AAAA1a2aaaa(a2)AAa(aa3)a(a34)AAa5a4aaaa5 | OPLS-2005 | 9.151 | c1nn([*])c(C)c1C     | -7.330 | -8.507 | -23.802 |
| 94  | DC-323 | A=A1AAAA1a2aaaa(a2)AAa(aa3)a(a34)AAa5a4aaaa5 | OPLS-2005 | 9.040 | [*]N(C)CCO           | -7.321 | -7.659 | -39.345 |
| 95  | DC-324 | A=A1AAAA1a2aaaa(a2)AAa(aa3)a(a34)AAa5a4aaaa5 | OPLS-2005 | 9.023 | [*]CC(F)(C)C         | -7.314 | -8.550 | -52.490 |
| 96  | DC-325 | A=A1AAAA1a2aaaa(a2)AAa(aa3)a(a34)AAa5a4aaaa5 | OPLS-2005 | 9.016 | [*]c1ccsn1           | -7.288 | -8.482 | -53.073 |
| 97  | DC-326 | A=A1AAAA1a2aaaa(a2)AAa(aa3)a(a34)AAa5a4aaaa5 | OPLS-2005 | 9.155 | CCN([*])CC           | -7.268 | -8.660 | -50.466 |
| 98  | DC-327 | A=A1AAAA1a2aaaa(a2)AAa(aa3)a(a34)AAa5a4aaaa5 | OPLS-2005 | 9.107 | [*]N(C)C1CC(C1)O     | -7.263 | -8.348 | -33.240 |
| 99  | DC-328 | A=A1AAAA1a2aaaa(a2)AAa(aa3)a(a34)AAa5a4aaaa5 | OPLS-2005 | 9.166 | [*]N1CCC1C           | -7.255 | -8.236 | -49.004 |
| 100 | DC-329 | A=A1AAAA1a2aaaa(a2)AAa(aa3)a(a34)AAa5a4aaaa5 | OPLS-2005 | 9.104 | [*]N(C)C1COC1        | -7.254 | -7.585 | -29.873 |
| 101 | DC-330 | A=A1AAAA1a2aaaa(a2)AAa(aa3)a(a34)AAa5a4aaaa5 | OPLS-2005 | 9.213 | [*]N(C1)CC[C@@H]1C#N | -7.252 | -8.251 | -48.339 |
| 102 | DC-331 | A=A1AAAA1a2aaaa(a2)AAa(aa3)a(a34)AAa5a4aaaa5 | OPLS-2005 | 9.183 | [*]CC(F)(C)CC        | -7.251 | -7.407 | -39.997 |
| 103 | DC-332 | A=A1AAAA1a2aaaa(a2)AAa(aa3)a(a34)AAa5a4aaaa5 | OPLS-2005 | 9.047 | [*]N(C1)CC1N         | -7.240 | -9.545 | -56.378 |

|     |        |                                             |           |       |                     |        |        |         |
|-----|--------|---------------------------------------------|-----------|-------|---------------------|--------|--------|---------|
| 104 | DC-333 | A=A1AAAA1a2aaa(a2)AAa(aa3)a(a34)AAa5a4aaaa5 | OPLS-2005 | 9.005 | [*][N-]C1CCNC1      | -7.235 | -7.730 | -31.081 |
| 105 | DC-334 | A=A1AAAA1a2aaa(a2)AAa(aa3)a(a34)AAa5a4aaaa5 | OPLS-2005 | 9.047 | [*]N(C1)CC1N        | -7.196 | -7.623 | -38.089 |
| 106 | DC-335 | A=A1AAAA1a2aaa(a2)AAa(aa3)a(a34)AAa5a4aaaa5 | OPLS-2005 | 9.297 | [*]N(C)C1(CN)CC1    | -7.186 | -8.422 | -51.568 |
| 107 | DC-336 | A=A1AAAA1a2aaa(a2)AAa(aa3)a(a34)AAa5a4aaaa5 | OPLS-2005 | 9.167 | [*]N1CCCCC1=O       | -7.184 | -7.276 | -18.575 |
| 108 | DC-337 | A=A1AAAA1a2aaa(a2)AAa(aa3)a(a34)AAa5a4aaaa5 | OPLS-2005 | 9.082 | [*]N[C@@H](C)C1CCC1 | -7.171 | -7.553 | -47.167 |
| 109 | DC-338 | A=A1AAAA1a2aaa(a2)AAa(aa3)a(a34)AAa5a4aaaa5 | OPLS-2005 | 9.166 | [*]N1CCC1C          | -7.123 | -7.424 | -43.694 |
| 110 | DC-339 | A=A1AAAA1a2aaa(a2)AAa(aa3)a(a34)AAa5a4aaaa5 | OPLS-2005 | 9.011 | [*]N(C)CC[NH-]      | -7.115 | -8.001 | -35.928 |
| 111 | DC-340 | A=A1AAAA1a2aaa(a2)AAa(aa3)a(a34)AAa5a4aaaa5 | OPLS-2005 | 9.065 | [*]NC(C)CC          | -7.109 | -9.108 | -52.793 |
| 112 | DC-341 | A=A1AAAA1a2aaa(a2)AAa(aa3)a(a34)AAa5a4aaaa5 | OPLS-2005 | 9.255 | C1CN([*])CCC1O      | -7.090 | -7.364 | -17.044 |
| 113 | DC-342 | A=A1AAAA1a2aaa(a2)AAa(aa3)a(a34)AAa5a4aaaa5 | OPLS-2005 | 9.285 | [*]N1CC[C@@H]1C(C)C | -7.088 | -8.471 | -48.580 |
| 114 | DC-343 | A=A1AAAA1a2aaa(a2)AAa(aa3)a(a34)AAa5a4aaaa5 | OPLS-2005 | 9.086 | [*]CC(F)(C)CN       | -7.078 | -9.060 | -53.611 |
| 115 | DC-344 | A=A1AAAA1a2aaa(a2)AAa(aa3)a(a34)AAa5a4aaaa5 | OPLS-2005 | 9.170 | [*]c1cccc1          | -7.073 | -7.168 | -49.469 |
| 116 | DC-345 | A=A1AAAA1a2aaa(a2)AAa(aa3)a(a34)AAa5a4aaaa5 | OPLS-2005 | 9.181 | [*]n1cccc1CC        | -7.066 | -8.243 | -49.828 |
| 117 | DC-346 | A=A1AAAA1a2aaa(a2)AAa(aa3)a(a34)AAa5a4aaaa5 | OPLS-2005 | 9.043 | [*]N[C@@H](C)CCO    | -7.055 | -9.048 | -54.427 |
| 118 | DC-347 | A=A1AAAA1a2aaa(a2)AAa(aa3)a(a34)AAa5a4aaaa5 | OPLS-2005 | 9.012 | [*]CC(CC)NC         | -7.053 | -8.230 | -51.582 |
| 119 | DC-348 | A=A1AAAA1a2aaa(a2)AAa(aa3)a(a34)AAa5a4aaaa5 | OPLS-2005 | 9.174 | [*]N1CCOCC1         | -7.046 | -7.157 | -19.644 |
| 120 | DC-349 | A=A1AAAA1a2aaa(a2)AAa(aa3)a(a34)AAa5a4aaaa5 | OPLS-2005 | 9.512 | [*]N1CCCC1(C)C      | -7.031 | -8.403 | -41.467 |
| 121 | DC-350 | A=A1AAAA1a2aaa(a2)AAa(aa3)a(a34)AAa5a4aaaa5 | OPLS-2005 | 9.297 | [*]N(C)C1(CN)CC1    | -7.018 | -9.504 | -52.871 |
| 122 | DC-351 | A=A1AAAA1a2aaa(a2)AAa(aa3)a(a34)AAa5a4aaaa5 | OPLS-2005 | 9.118 | [*]OC1(CC)CCC1      | -7.014 | -8.246 | -48.809 |
| 123 | DC-352 | A=A1AAAA1a2aaa(a2)AAa(aa3)a(a34)AAa5a4aaaa5 | OPLS-2005 | 9.067 | [*]NC(C)(C)CO       | -7.011 | -9.013 | -52.757 |
| 124 | DC-353 | A=A1AAAA1a2aaa(a2)AAa(aa3)a(a34)AAa5a4aaaa5 | OPLS-2005 | 9.023 | [*]CNC1(CN)CC1      | -6.998 | -9.192 | -33.322 |
| 125 | DC-354 | A=A1AAAA1a2aaa(a2)AAa(aa3)a(a34)AAa5a4aaaa5 | OPLS-2005 | 9.030 | [*]CC(C)(O)CC       | -6.970 | -8.656 | -35.737 |
| 126 | DC-355 | A=A1AAAA1a2aaa(a2)AAa(aa3)a(a34)AAa5a4aaaa5 | OPLS-2005 | 9.164 | [*]N(C)CC(C)(C)N    | -6.934 | -8.158 | -48.162 |

|     |        |                                             |           |       |                          |        |        |         |
|-----|--------|---------------------------------------------|-----------|-------|--------------------------|--------|--------|---------|
| 127 | DC-356 | A=A1AAAA1a2aaa(a2)AAa(aa3)a(a34)AAa5a4aaaa5 | OPLS-2005 | 9.131 | [*]N(C)CC(C)N            | -6.930 | -8.152 | -49.902 |
| 128 | DC-357 | A=A1AAAA1a2aaa(a2)AAa(aa3)a(a34)AAa5a4aaaa5 | OPLS-2005 | 9.072 | [*]NC1(CC)CC1            | -6.903 | -7.791 | -45.522 |
| 129 | DC-358 | A=A1AAAA1a2aaa(a2)AAa(aa3)a(a34)AAa5a4aaaa5 | OPLS-2005 | 9.193 | [*]N1C[C@@H](O)C1(C)C    | -6.900 | -8.266 | -47.494 |
| 130 | DC-359 | A=A1AAAA1a2aaa(a2)AAa(aa3)a(a34)AAa5a4aaaa5 | OPLS-2005 | 9.119 | [*]c1c(C)csn1            | -6.899 | -9.025 | -47.667 |
| 131 | DC-360 | A=A1AAAA1a2aaa(a2)AAa(aa3)a(a34)AAa5a4aaaa5 | OPLS-2005 | 9.147 | [*]N1CCC1C#N             | -6.892 | -7.278 | -38.933 |
| 132 | DC-361 | A=A1AAAA1a2aaa(a2)AAa(aa3)a(a34)AAa5a4aaaa5 | OPLS-2005 | 9.190 | [*]c1c(C#N)cccn1         | -6.884 | -6.978 | -49.874 |
| 133 | DC-362 | A=A1AAAA1a2aaa(a2)AAa(aa3)a(a34)AAa5a4aaaa5 | OPLS-2005 | 9.080 | [*]N(C)C(=O)C(C)C        | -6.873 | -6.960 | -36.236 |
| 134 | DC-363 | A=A1AAAA1a2aaa(a2)AAa(aa3)a(a34)AAa5a4aaaa5 | OPLS-2005 | 9.209 | [*]N(C)[C@H](C1)C[C@H]1C | -6.864 | -7.252 | -44.215 |
| 135 | DC-364 | A=A1AAAA1a2aaa(a2)AAa(aa3)a(a34)AAa5a4aaaa5 | OPLS-2005 | 9.046 | [*]N(C)CC(F)F            | -6.799 | -7.758 | -33.882 |
| 136 | DC-365 | A=A1AAAA1a2aaa(a2)AAa(aa3)a(a34)AAa5a4aaaa5 | OPLS-2005 | 9.054 | [*]CC(C)(C)N             | -6.796 | -6.884 | -42.360 |
| 137 | DC-366 | A=A1AAAA1a2aaa(a2)AAa(aa3)a(a34)AAa5a4aaaa5 | OPLS-2005 | 9.112 | [*]CC1(CN)CNC1           | -6.787 | -7.986 | -48.577 |
| 138 | DC-367 | A=A1AAAA1a2aaa(a2)AAa(aa3)a(a34)AAa5a4aaaa5 | OPLS-2005 | 9.119 | [*]c1c(C)csn1            | -6.745 | -6.849 | -31.221 |
| 139 | DC-368 | A=A1AAAA1a2aaa(a2)AAa(aa3)a(a34)AAa5a4aaaa5 | OPLS-2005 | 9.224 | [*]n1c(C)ncc1C           | -6.724 | -6.837 | -51.968 |
| 140 | DC-369 | A=A1AAAA1a2aaa(a2)AAa(aa3)a(a34)AAa5a4aaaa5 | OPLS-2005 | 9.034 | [*]C[C@H]1C[C@@H](C1)CN  | -6.720 | -7.936 | -42.455 |
| 141 | DC-370 | A=A1AAAA1a2aaa(a2)AAa(aa3)a(a34)AAa5a4aaaa5 | OPLS-2005 | 9.036 | [*]NC1(C)CCC1            | -6.704 | -7.813 | -48.631 |
| 142 | DC-371 | A=A1AAAA1a2aaa(a2)AAa(aa3)a(a34)AAa5a4aaaa5 | OPLS-2005 | 9.148 | [*]c1c(C)[nH]cc1         | -6.702 | -7.889 | -33.067 |
| 143 | DC-372 | A=A1AAAA1a2aaa(a2)AAa(aa3)a(a34)AAa5a4aaaa5 | OPLS-2005 | 9.201 | [*]N1C[C@@H](N)C1(C)C    | -6.664 | -8.864 | -54.134 |
| 144 | DC-373 | A=A1AAAA1a2aaa(a2)AAa(aa3)a(a34)AAa5a4aaaa5 | OPLS-2005 | 9.137 | [*]CN(C)C(C)CN           | -6.661 | -6.763 | -47.619 |
| 145 | DC-374 | A=A1AAAA1a2aaa(a2)AAa(aa3)a(a34)AAa5a4aaaa5 | OPLS-2005 | 9.005 | [*][N-]C1CCNC1           | -6.654 | -8.845 | -52.445 |
| 146 | DC-375 | A=A1AAAA1a2aaa(a2)AAa(aa3)a(a34)AAa5a4aaaa5 | OPLS-2005 | 9.182 | [*]CC(C)(O)C(C)C         | -6.650 | -8.272 | -36.398 |
| 147 | DC-376 | A=A1AAAA1a2aaa(a2)AAa(aa3)a(a34)AAa5a4aaaa5 | OPLS-2005 | 9.030 | [*]N(C1)CC1O             | -6.637 | -8.640 | -48.139 |
| 148 | DC-377 | A=A1AAAA1a2aaa(a2)AAa(aa3)a(a34)AAa5a4aaaa5 | OPLS-2005 | 9.011 | [*]N(C)CC[NH-]           | -6.633 | -8.063 | -46.598 |
| 149 | DC-378 | A=A1AAAA1a2aaa(a2)AAa(aa3)a(a34)AAa5a4aaaa5 | OPLS-2005 | 9.046 | [*]NC1(CC1)CCO           | -6.606 | -7.499 | -43.538 |

|     |        |                                              |           |       |                         |        |        |         |
|-----|--------|----------------------------------------------|-----------|-------|-------------------------|--------|--------|---------|
| 150 | DC-379 | A=A1AAAA1a2aaaa(a2)AAa(aa3)a(a34)AAa5a4aaaa5 | OPLS-2005 | 9.287 | [*]N(C)[C@@H](C1)C1(C)C | -6.599 | -7.908 | -45.074 |
| 151 | DC-380 | A=A1AAAA1a2aaaa(a2)AAa(aa3)a(a34)AAa5a4aaaa5 | OPLS-2005 | 9.126 | [*]NC(CC)C1CC1          | -6.595 | -7.567 | -46.514 |
| 152 | DC-381 | A=A1AAAA1a2aaaa(a2)AAa(aa3)a(a34)AAa5a4aaaa5 | OPLS-2005 | 9.115 | [*]CC1(C)CC(C1)N        | -6.564 | -6.674 | -43.506 |
| 153 | DC-382 | A=A1AAAA1a2aaaa(a2)AAa(aa3)a(a34)AAa5a4aaaa5 | OPLS-2005 | 9.030 | [*]N(C1)CC1O            | -6.527 | -6.865 | -30.929 |
| 154 | DC-383 | A=A1AAAA1a2aaaa(a2)AAa(aa3)a(a34)AAa5a4aaaa5 | OPLS-2005 | 9.166 | [*]N1CCC1C              | -6.519 | -8.089 | -37.362 |
| 155 | DC-384 | A=A1AAAA1a2aaaa(a2)AAa(aa3)a(a34)AAa5a4aaaa5 | OPLS-2005 | 9.050 | [*]NC1(C)CCCC1          | -6.510 | -7.738 | -48.724 |
| 156 | DC-385 | A=A1AAAA1a2aaaa(a2)AAa(aa3)a(a34)AAa5a4aaaa5 | OPLS-2005 | 9.057 | [*]c1c(O)cco1           | -6.497 | -7.809 | -26.705 |
| 157 | DC-386 | A=A1AAAA1a2aaaa(a2)AAa(aa3)a(a34)AAa5a4aaaa5 | OPLS-2005 | 9.233 | [*]N(C)CC(C)C           | -6.486 | -7.848 | -30.625 |
| 158 | DC-387 | A=A1AAAA1a2aaaa(a2)AAa(aa3)a(a34)AAa5a4aaaa5 | OPLS-2005 | 9.262 | C1CN([*])CCC1N          | -6.476 | -7.996 | -35.499 |
| 159 | DC-388 | A=A1AAAA1a2aaaa(a2)AAa(aa3)a(a34)AAa5a4aaaa5 | OPLS-2005 | 9.212 | [*]c1c(O)cccc1          | -6.461 | -6.556 | -46.072 |
| 160 | DC-389 | A=A1AAAA1a2aaaa(a2)AAa(aa3)a(a34)AAa5a4aaaa5 | OPLS-2005 | 9.131 | [*]N(C)CC(C)N           | -6.461 | -7.693 | -33.920 |
| 161 | DC-390 | A=A1AAAA1a2aaaa(a2)AAa(aa3)a(a34)AAa5a4aaaa5 | OPLS-2005 | 9.070 | c1[nH]n([*])c(=O)c1C    | -6.440 | -6.603 | -47.038 |
| 162 | DC-391 | A=A1AAAA1a2aaaa(a2)AAa(aa3)a(a34)AAa5a4aaaa5 | OPLS-2005 | 9.131 | [*]N(C)CC(C)N           | -6.434 | -8.893 | -56.015 |
| 163 | DC-392 | A=A1AAAA1a2aaaa(a2)AAa(aa3)a(a34)AAa5a4aaaa5 | OPLS-2005 | 9.195 | [*]N(C)C(C)C            | -6.429 | -7.338 | -31.584 |
| 164 | DC-393 | A=A1AAAA1a2aaaa(a2)AAa(aa3)a(a34)AAa5a4aaaa5 | OPLS-2005 | 9.063 | [*]c1c(O)ccs1           | -6.407 | -9.024 | -47.477 |
| 165 | DC-394 | A=A1AAAA1a2aaaa(a2)AAa(aa3)a(a34)AAa5a4aaaa5 | OPLS-2005 | 9.104 | [*]N(C)C1COC1           | -6.385 | -8.383 | -48.238 |
| 166 | DC-395 | A=A1AAAA1a2aaaa(a2)AAa(aa3)a(a34)AAa5a4aaaa5 | OPLS-2005 | 9.024 | [*]c1cc(O)sc1           | -6.385 | -6.828 | -52.067 |
| 167 | DC-396 | A=A1AAAA1a2aaaa(a2)AAa(aa3)a(a34)AAa5a4aaaa5 | OPLS-2005 | 9.237 | [*]c1c(N)cccc1          | -6.375 | -6.474 | -42.274 |
| 168 | DC-397 | A=A1AAAA1a2aaaa(a2)AAa(aa3)a(a34)AAa5a4aaaa5 | OPLS-2005 | 9.203 | [*]OC(C)(CC)CN          | -6.344 | -8.227 | -51.000 |
| 169 | DC-398 | A=A1AAAA1a2aaaa(a2)AAa(aa3)a(a34)AAa5a4aaaa5 | OPLS-2005 | 9.189 | [*]N1CCC1(C)C           | -6.331 | -7.302 | -42.660 |
| 170 | DC-399 | A=A1AAAA1a2aaaa(a2)AAa(aa3)a(a34)AAa5a4aaaa5 | OPLS-2005 | 9.061 | [*]CC(C)C(=O)NC         | -6.320 | -8.060 | -49.213 |
| 171 | DC-400 | A=A1AAAA1a2aaaa(a2)AAa(aa3)a(a34)AAa5a4aaaa5 | OPLS-2005 | 9.034 | [*]C[C@H]1C[C@@H](C1)CN | -6.305 | -7.994 | -24.898 |
| 172 | DC-401 | A=A1AAAA1a2aaaa(a2)AAa(aa3)a(a34)AAa5a4aaaa5 | OPLS-2005 | 9.166 | [*]N(C1)CC1(F)CN        | -6.300 | -6.597 | -27.744 |

|     |        |                                              |           |       |                         |        |        |         |
|-----|--------|----------------------------------------------|-----------|-------|-------------------------|--------|--------|---------|
| 173 | DC-402 | A=A1AAAA1a2aaaa(a2)AAa(aa3)a(a34)AAa5a4aaaa5 | OPLS-2005 | 9.247 | [*]N(C)C1(C)CC1         | -6.273 | -7.163 | -39.237 |
| 174 | DC-403 | A=A1AAAA1a2aaaa(a2)AAa(aa3)a(a34)AAa5a4aaaa5 | OPLS-2005 | 9.287 | [*]N(C)[C@@H](C1)C1(C)C | -6.247 | -8.585 | -54.262 |
| 175 | DC-404 | A=A1AAAA1a2aaaa(a2)AAa(aa3)a(a34)AAa5a4aaaa5 | OPLS-2005 | 9.281 | [*]CC(C)(CC)CN          | -6.239 | -8.078 | -49.100 |
| 176 | DC-405 | A=A1AAAA1a2aaaa(a2)AAa(aa3)a(a34)AAa5a4aaaa5 | OPLS-2005 | 9.133 | [*]O[C@@H](C)C(C)(C)N   | -6.229 | -6.797 | -38.984 |
| 177 | DC-406 | A=A1AAAA1a2aaaa(a2)AAa(aa3)a(a34)AAa5a4aaaa5 | OPLS-2005 | 9.156 | [*]c1c(O)cnc1           | -6.223 | -6.628 | -52.405 |
| 178 | DC-407 | A=A1AAAA1a2aaaa(a2)AAa(aa3)a(a34)AAa5a4aaaa5 | OPLS-2005 | 9.053 | [*]c1cc(CN)c[nH]1       | -6.209 | -6.306 | -45.833 |
| 179 | DC-408 | A=A1AAAA1a2aaaa(a2)AAa(aa3)a(a34)AAa5a4aaaa5 | OPLS-2005 | 9.139 | [*]N(C)C1CCC1           | -6.195 | -7.232 | -38.257 |
| 180 | DC-409 | A=A1AAAA1a2aaaa(a2)AAa(aa3)a(a34)AAa5a4aaaa5 | OPLS-2005 | 9.120 | [*]NC(C)(C1)C1(C)C      | -6.193 | -7.668 | -47.144 |
| 181 | DC-410 | A=A1AAAA1a2aaaa(a2)AAa(aa3)a(a34)AAa5a4aaaa5 | OPLS-2005 | 9.155 | CCN([*])CC              | -6.167 | -7.149 | -29.745 |
| 182 | DC-411 | A=A1AAAA1a2aaaa(a2)AAa(aa3)a(a34)AAa5a4aaaa5 | OPLS-2005 | 9.148 | [*]CC(C)(CN)NC          | -6.159 | -8.604 | -54.327 |
| 183 | DC-412 | A=A1AAAA1a2aaaa(a2)AAa(aa3)a(a34)AAa5a4aaaa5 | OPLS-2005 | 9.088 | [H]N=c1[n(*)]ccn1C      | -6.157 | -6.245 | -47.055 |
| 184 | DC-413 | A=A1AAAA1a2aaaa(a2)AAa(aa3)a(a34)AAa5a4aaaa5 | OPLS-2005 | 9.219 | [*]NC1(CC)CCC1          | -6.133 | -8.195 | -49.225 |
| 185 | DC-414 | A=A1AAAA1a2aaaa(a2)AAa(aa3)a(a34)AAa5a4aaaa5 | OPLS-2005 | 9.072 | [*]NC1(CC)CC1           | -6.120 | -7.545 | -45.990 |
| 186 | DC-415 | A=A1AAAA1a2aaaa(a2)AAa(aa3)a(a34)AAa5a4aaaa5 | OPLS-2005 | 9.140 | [*]c1c(CN)occ1          | -6.103 | -7.940 | -46.200 |
| 187 | DC-416 | A=A1AAAA1a2aaaa(a2)AAa(aa3)a(a34)AAa5a4aaaa5 | OPLS-2005 | 9.095 | [*]c1cc(N)cnc1          | -6.097 | -6.193 | -2.438  |
| 188 | DC-417 | A=A1AAAA1a2aaaa(a2)AAa(aa3)a(a34)AAa5a4aaaa5 | OPLS-2005 | 9.151 | [*]c1c(CC)cc[nH]1       | -6.038 | -6.135 | -25.782 |
| 189 | DC-418 | A=A1AAAA1a2aaaa(a2)AAa(aa3)a(a34)AAa5a4aaaa5 | OPLS-2005 | 9.068 | [*]n1ccnc1C             | -6.025 | -7.215 | -36.720 |
| 190 | DC-419 | A=A1AAAA1a2aaaa(a2)AAa(aa3)a(a34)AAa5a4aaaa5 | OPLS-2005 | 9.285 | [*]N1CC[C@@H]1C(C)C     | -5.992 | -6.965 | -45.214 |
| 191 | DC-420 | A=A1AAAA1a2aaaa(a2)AAa(aa3)a(a34)AAa5a4aaaa5 | OPLS-2005 | 9.342 | [*]N(C)C(C)CN           | -5.991 | -7.211 | -47.905 |
| 192 | DC-421 | A=A1AAAA1a2aaaa(a2)AAa(aa3)a(a34)AAa5a4aaaa5 | OPLS-2005 | 9.093 | [*]c1c(F)cccn1          | -5.949 | -6.043 | -48.692 |
| 193 | DC-422 | A=A1AAAA1a2aaaa(a2)AAa(aa3)a(a34)AAa5a4aaaa5 | OPLS-2005 | 9.155 | CCN([*])CC              | -5.945 | -8.603 | -48.463 |
| 194 | DC-423 | A=A1AAAA1a2aaaa(a2)AAa(aa3)a(a34)AAa5a4aaaa5 | OPLS-2005 | 9.026 | [*]n1nccc1OC            | -5.917 | -6.005 | -46.823 |
| 195 | DC-424 | A=A1AAAA1a2aaaa(a2)AAa(aa3)a(a34)AAa5a4aaaa5 | OPLS-2005 | 9.030 | [*]N(C1)CC1O            | -5.914 | -6.826 | -25.482 |

|     |        |                                              |           |       |                      |        |        |         |
|-----|--------|----------------------------------------------|-----------|-------|----------------------|--------|--------|---------|
| 196 | DC-425 | A=A1AAAA1a2aaaa(a2)AAa(aa3)a(a34)AAa5a4aaaa5 | OPLS-2005 | 9.070 | O=C1N([*])CCN1       | -5.912 | -6.307 | -31.129 |
| 197 | DC-426 | A=A1AAAA1a2aaaa(a2)AAa(aa3)a(a34)AAa5a4aaaa5 | OPLS-2005 | 9.048 | [*]N[C@@H](C(C)C)CO  | -5.899 | -6.813 | -42.085 |
| 198 | DC-427 | A=A1AAAA1a2aaaa(a2)AAa(aa3)a(a34)AAa5a4aaaa5 | OPLS-2005 | 9.253 | [*]N(C)CC1(N)CC1     | -5.888 | -7.169 | -50.748 |
| 199 | DC-428 | A=A1AAAA1a2aaaa(a2)AAa(aa3)a(a34)AAa5a4aaaa5 | OPLS-2005 | 9.078 | [*]c1c(O)cn(n1)C     | -5.874 | -6.367 | -47.382 |
| 200 | DC-429 | A=A1AAAA1a2aaaa(a2)AAa(aa3)a(a34)AAa5a4aaaa5 | OPLS-2005 | 9.169 | [*]OC1(C)CCNC1       | -5.834 | -6.899 | -35.642 |
| 201 | DC-430 | A=A1AAAA1a2aaaa(a2)AAa(aa3)a(a34)AAa5a4aaaa5 | OPLS-2005 | 9.186 | [*]OC1(C)CCOC1       | -5.831 | -5.962 | -27.117 |
| 202 | DC-431 | A=A1AAAA1a2aaaa(a2)AAa(aa3)a(a34)AAa5a4aaaa5 | OPLS-2005 | 9.297 | [*]N(C)C1(CN)CC1     | -5.810 | -7.057 | -40.438 |
| 203 | DC-432 | A=A1AAAA1a2aaaa(a2)AAa(aa3)a(a34)AAa5a4aaaa5 | OPLS-2005 | 9.044 | [*]c1cn(cn1)CC       | -5.799 | -5.893 | -43.196 |
| 204 | DC-433 | A=A1AAAA1a2aaaa(a2)AAa(aa3)a(a34)AAa5a4aaaa5 | OPLS-2005 | 9.219 | [*]NC1(CC)CCC1       | -5.784 | -6.174 | -43.586 |
| 205 | DC-434 | A=A1AAAA1a2aaaa(a2)AAa(aa3)a(a34)AAa5a4aaaa5 | OPLS-2005 | 9.329 | [*]N(C)C1(CC)CC1     | -5.783 | -8.444 | -54.375 |
| 206 | DC-435 | A=A1AAAA1a2aaaa(a2)AAa(aa3)a(a34)AAa5a4aaaa5 | OPLS-2005 | 9.201 | [*]OC(C)C1(C)CC1     | -5.781 | -5.930 | -36.992 |
| 207 | DC-436 | A=A1AAAA1a2aaaa(a2)AAa(aa3)a(a34)AAa5a4aaaa5 | OPLS-2005 | 9.146 | [*]c1cccn1C          | -5.773 | -8.225 | -46.232 |
| 208 | DC-437 | A=A1AAAA1a2aaaa(a2)AAa(aa3)a(a34)AAa5a4aaaa5 | OPLS-2005 | 9.242 | [*]c1c(C)ccnc1       | -5.764 | -5.858 | -43.721 |
| 209 | DC-438 | A=A1AAAA1a2aaaa(a2)AAa(aa3)a(a34)AAa5a4aaaa5 | OPLS-2005 | 9.345 | CC(C)N([*])C1CC1     | -5.749 | -6.709 | -48.854 |
| 210 | DC-439 | A=A1AAAA1a2aaaa(a2)AAa(aa3)a(a34)AAa5a4aaaa5 | OPLS-2005 | 9.011 | [*]c1c(O)cn[nH]1     | -5.727 | -6.323 | -31.142 |
| 211 | DC-440 | A=A1AAAA1a2aaaa(a2)AAa(aa3)a(a34)AAa5a4aaaa5 | OPLS-2005 | 9.244 | [*]c1c(N)ccn1C       | -5.702 | -6.890 | -44.051 |
| 212 | DC-441 | A=A1AAAA1a2aaaa(a2)AAa(aa3)a(a34)AAa5a4aaaa5 | OPLS-2005 | 9.064 | [*]c1c(O)scc1        | -5.699 | -7.765 | -43.958 |
| 213 | DC-442 | A=A1AAAA1a2aaaa(a2)AAa(aa3)a(a34)AAa5a4aaaa5 | OPLS-2005 | 9.128 | [*]N1CCC1CCO         | -5.679 | -7.245 | -33.465 |
| 214 | DC-443 | A=A1AAAA1a2aaaa(a2)AAa(aa3)a(a34)AAa5a4aaaa5 | OPLS-2005 | 9.251 | [*]c1c(C)cccn1       | -5.655 | -5.749 | -43.013 |
| 215 | DC-444 | A=A1AAAA1a2aaaa(a2)AAa(aa3)a(a34)AAa5a4aaaa5 | OPLS-2005 | 9.481 | [*]N1[C@@H](C)C1(C)C | -5.655 | -7.368 | -35.498 |
| 216 | DC-445 | A=A1AAAA1a2aaaa(a2)AAa(aa3)a(a34)AAa5a4aaaa5 | OPLS-2005 | 9.050 | [*]NC1(C)CCCC1       | -5.638 | -7.954 | -52.006 |
| 217 | DC-446 | A=A1AAAA1a2aaaa(a2)AAa(aa3)a(a34)AAa5a4aaaa5 | OPLS-2005 | 9.107 | [*]N(C)C1CC(C1)O     | -5.638 | -7.841 | -52.280 |
| 218 | DC-447 | A=A1AAAA1a2aaaa(a2)AAa(aa3)a(a34)AAa5a4aaaa5 | OPLS-2005 | 9.006 | [*]c1c(=O)n(C)[nH]c1 | -5.602 | -5.968 | -42.788 |

|     |        |                                             |           |       |                     |        |        |         |
|-----|--------|---------------------------------------------|-----------|-------|---------------------|--------|--------|---------|
| 219 | DC-448 | A=A1AAAA1a2aaa(a2)AAa(aa3)a(a34)AAa5a4aaaa5 | OPLS-2005 | 9.030 | [*]N(C1)CC1O        | -5.600 | -7.029 | -42.498 |
| 220 | DC-449 | A=A1AAAA1a2aaa(a2)AAa(aa3)a(a34)AAa5a4aaaa5 | OPLS-2005 | 9.028 | [*]CC1(C)[C@H](C1)O | -5.598 | -5.755 | -48.091 |
| 221 | DC-450 | A=A1AAAA1a2aaa(a2)AAa(aa3)a(a34)AAa5a4aaaa5 | OPLS-2005 | 9.114 | [*]NC1(CC)CNC1      | -5.590 | -6.823 | -29.032 |
| 222 | DC-451 | A=A1AAAA1a2aaa(a2)AAa(aa3)a(a34)AAa5a4aaaa5 | OPLS-2005 | 9.147 | [*]N1CCCC1C#N       | -5.573 | -6.421 | -44.166 |
| 223 | DC-452 | A=A1AAAA1a2aaa(a2)AAa(aa3)a(a34)AAa5a4aaaa5 | OPLS-2005 | 9.028 | [*]CC(C)CNC         | -5.563 | -7.447 | -30.784 |
| 224 | DC-453 | A=A1AAAA1a2aaa(a2)AAa(aa3)a(a34)AAa5a4aaaa5 | OPLS-2005 | 9.199 | [*]c1c(C)cn(C)c1    | -5.560 | -5.657 | -40.168 |
| 225 | DC-454 | A=A1AAAA1a2aaa(a2)AAa(aa3)a(a34)AAa5a4aaaa5 | OPLS-2005 | 9.123 | [*]N(C1)CC1C(C)C    | -5.557 | -5.949 | -41.152 |
| 226 | DC-455 | A=A1AAAA1a2aaa(a2)AAa(aa3)a(a34)AAa5a4aaaa5 | OPLS-2005 | 9.065 | [*]NC(C)CC          | -5.513 | -7.994 | -53.690 |
| 227 | DC-456 | A=A1AAAA1a2aaa(a2)AAa(aa3)a(a34)AAa5a4aaaa5 | OPLS-2005 | 9.082 | [*]c1cncn1C         | -5.497 | -8.122 | -50.630 |
| 228 | DC-457 | A=A1AAAA1a2aaa(a2)AAa(aa3)a(a34)AAa5a4aaaa5 | OPLS-2005 | 9.060 | [*]NC(C)(C)C        | -5.488 | -7.474 | -46.348 |
| 229 | DC-458 | A=A1AAAA1a2aaa(a2)AAa(aa3)a(a34)AAa5a4aaaa5 | OPLS-2005 | 9.032 | [*]CCC(C)(O)CN      | -5.407 | -6.444 | -40.039 |
| 230 | DC-459 | A=A1AAAA1a2aaa(a2)AAa(aa3)a(a34)AAa5a4aaaa5 | OPLS-2005 | 9.232 | [*]N1CCCOCC1        | -5.404 | -6.382 | -34.740 |
| 231 | DC-460 | A=A1AAAA1a2aaa(a2)AAa(aa3)a(a34)AAa5a4aaaa5 | OPLS-2005 | 9.300 | [*]N(C1)CCC1(C)C    | -5.400 | -8.100 | -50.767 |
| 232 | DC-461 | A=A1AAAA1a2aaa(a2)AAa(aa3)a(a34)AAa5a4aaaa5 | OPLS-2005 | 9.029 | [*]OC(CC)CC         | -5.370 | -7.854 | -51.745 |
| 233 | DC-462 | A=A1AAAA1a2aaa(a2)AAa(aa3)a(a34)AAa5a4aaaa5 | OPLS-2005 | 9.291 | [*]N1CC[C@@H]1CC    | -5.364 | -7.432 | -34.520 |
| 234 | DC-463 | A=A1AAAA1a2aaa(a2)AAa(aa3)a(a34)AAa5a4aaaa5 | OPLS-2005 | 9.074 | [*]n1nccc1CO        | -5.363 | -6.540 | -40.121 |
| 235 | DC-464 | A=A1AAAA1a2aaa(a2)AAa(aa3)a(a34)AAa5a4aaaa5 | OPLS-2005 | 9.182 | [*]N(C1)CC1(C)C     | -5.348 | -6.711 | -47.611 |
| 236 | DC-465 | A=A1AAAA1a2aaa(a2)AAa(aa3)a(a34)AAa5a4aaaa5 | OPLS-2005 | 9.357 | [*]N(C)C(C)(C)C     | -5.336 | -6.232 | -30.545 |
| 237 | DC-466 | A=A1AAAA1a2aaa(a2)AAa(aa3)a(a34)AAa5a4aaaa5 | OPLS-2005 | 9.213 | [*]c1c(C)coc1O      | -5.324 | -5.465 | -44.572 |
| 238 | DC-467 | A=A1AAAA1a2aaa(a2)AAa(aa3)a(a34)AAa5a4aaaa5 | OPLS-2005 | 9.047 | [*]N(C1)CC1N        | -5.317 | -7.522 | -38.219 |
| 239 | DC-468 | A=A1AAAA1a2aaa(a2)AAa(aa3)a(a34)AAa5a4aaaa5 | OPLS-2005 | 9.058 | [*]CCC1(CN)CC1      | -5.313 | -6.563 | -42.133 |
| 240 | DC-469 | A=A1AAAA1a2aaa(a2)AAa(aa3)a(a34)AAa5a4aaaa5 | OPLS-2005 | 9.248 | [*]N(C)C1CCCC1      | -5.240 | -6.357 | -49.928 |
| 241 | DC-470 | A=A1AAAA1a2aaa(a2)AAa(aa3)a(a34)AAa5a4aaaa5 | OPLS-2005 | 9.015 | [*]CC1(O)CN(C)C1    | -5.238 | -7.911 | -48.770 |

|     |        |                                              |           |       |                       |        |        |         |
|-----|--------|----------------------------------------------|-----------|-------|-----------------------|--------|--------|---------|
| 242 | DC-471 | A=A1AAAA1a2aaaa(a2)AAa(aa3)a(a34)AAa5a4aaaa5 | OPLS-2005 | 9.404 | [*]N(C)[C@@H](C)C(C)C | -5.235 | -5.577 | -40.829 |
| 243 | DC-472 | A=A1AAAA1a2aaaa(a2)AAa(aa3)a(a34)AAa5a4aaaa5 | OPLS-2005 | 9.062 | [*]OC1(CC)CNC1        | -5.223 | -6.655 | -28.789 |
| 244 | DC-473 | A=A1AAAA1a2aaaa(a2)AAa(aa3)a(a34)AAa5a4aaaa5 | OPLS-2005 | 9.121 | [*]N(C1)CC1(C)N       | -5.221 | -6.490 | -41.481 |
| 245 | DC-474 | A=A1AAAA1a2aaaa(a2)AAa(aa3)a(a34)AAa5a4aaaa5 | OPLS-2005 | 9.158 | [*]N(C)CC(C)(C)O      | -5.203 | -5.531 | -37.007 |
| 246 | DC-475 | A=A1AAAA1a2aaaa(a2)AAa(aa3)a(a34)AAa5a4aaaa5 | OPLS-2005 | 9.090 | [*]O[C@@H](C)C1CCC1   | -5.195 | -6.599 | -32.198 |
| 247 | DC-476 | A=A1AAAA1a2aaaa(a2)AAa(aa3)a(a34)AAa5a4aaaa5 | OPLS-2005 | 9.061 | [*]O[C@@H](C1(C)C)CN1 | -5.165 | -6.551 | -41.159 |
| 248 | DC-477 | A=A1AAAA1a2aaaa(a2)AAa(aa3)a(a34)AAa5a4aaaa5 | OPLS-2005 | 9.026 | [*]N(C)CC1CC1         | -5.157 | -6.194 | -45.332 |
| 249 | DC-478 | A=A1AAAA1a2aaaa(a2)AAa(aa3)a(a34)AAa5a4aaaa5 | OPLS-2005 | 9.453 | [*]N1CCC1(C)CC        | -5.130 | -7.188 | -46.314 |
| 250 | DC-479 | A=A1AAAA1a2aaaa(a2)AAa(aa3)a(a34)AAa5a4aaaa5 | OPLS-2005 | 9.349 | [*]c1c(C)cccc1        | -5.126 | -7.714 | -27.110 |
| 251 | DC-480 | A=A1AAAA1a2aaaa(a2)AAa(aa3)a(a34)AAa5a4aaaa5 | OPLS-2005 | 9.025 | [*]c1c(O)occ1         | -5.125 | -5.260 | -43.865 |
| 252 | DC-481 | A=A1AAAA1a2aaaa(a2)AAa(aa3)a(a34)AAa5a4aaaa5 | OPLS-2005 | 9.001 | [*]OCCCC1(N)CC1       | -5.122 | -6.582 | -46.579 |
| 253 | DC-482 | A=A1AAAA1a2aaaa(a2)AAa(aa3)a(a34)AAa5a4aaaa5 | OPLS-2005 | 9.002 | [*]c1nnen1CC          | -5.121 | -5.225 | -27.297 |
| 254 | DC-483 | A=A1AAAA1a2aaaa(a2)AAa(aa3)a(a34)AAa5a4aaaa5 | OPLS-2005 | 9.030 | [*]N(C1)CC1O          | -5.115 | -7.673 | -28.707 |
| 255 | DC-484 | A=A1AAAA1a2aaaa(a2)AAa(aa3)a(a34)AAa5a4aaaa5 | OPLS-2005 | 9.112 | [*]CC1(CN)CNC1        | -5.110 | -5.220 | -20.438 |
| 256 | DC-485 | A=A1AAAA1a2aaaa(a2)AAa(aa3)a(a34)AAa5a4aaaa5 | OPLS-2005 | 9.001 | [*]c1c(O)c[nH]n1      | -5.071 | -5.687 | -33.458 |
| 257 | DC-486 | A=A1AAAA1a2aaaa(a2)AAa(aa3)a(a34)AAa5a4aaaa5 | OPLS-2005 | 9.047 | [*]n(c1)ccc1CN        | -5.059 | -5.151 | -40.007 |
| 258 | DC-487 | A=A1AAAA1a2aaaa(a2)AAa(aa3)a(a34)AAa5a4aaaa5 | OPLS-2005 | 9.146 | [*]CC1(C)[C@H](O)CC1  | -5.048 | -6.276 | -43.058 |
| 259 | DC-488 | A=A1AAAA1a2aaaa(a2)AAa(aa3)a(a34)AAa5a4aaaa5 | OPLS-2005 | 9.212 | [*]N(C1)CC1(C)CC      | -5.023 | -6.332 | -5.559  |
| 260 | DC-489 | A=A1AAAA1a2aaaa(a2)AAa(aa3)a(a34)AAa5a4aaaa5 | OPLS-2005 | 9.204 | [*]N(C1)CC[C@@H]1CN   | -4.994 | -6.226 | -38.338 |
| 261 | DC-490 | A=A1AAAA1a2aaaa(a2)AAa(aa3)a(a34)AAa5a4aaaa5 | OPLS-2005 | 9.087 | [*]C[C@@H](CO)C1CC1   | -4.984 | -6.187 | -26.834 |
| 262 | DC-491 | A=A1AAAA1a2aaaa(a2)AAa(aa3)a(a34)AAa5a4aaaa5 | OPLS-2005 | 9.116 | [*]N(C1)CC1CC         | -4.958 | -5.995 | -44.006 |
| 263 | DC-492 | A=A1AAAA1a2aaaa(a2)AAa(aa3)a(a34)AAa5a4aaaa5 | OPLS-2005 | 9.233 | [*]N(C)CC(C)C         | -4.939 | -6.942 | -13.982 |
| 264 | DC-493 | A=A1AAAA1a2aaaa(a2)AAa(aa3)a(a34)AAa5a4aaaa5 | OPLS-2005 | 9.232 | [*]N1CCCCOCC1         | -4.930 | -5.214 | -37.385 |

|     |        |                                              |           |       |                       |        |        |         |
|-----|--------|----------------------------------------------|-----------|-------|-----------------------|--------|--------|---------|
| 265 | DC-494 | A=A1AAAA1a2aaaa(a2)AAa(aa3)a(a34)AAa5a4aaaa5 | OPLS-2005 | 9.026 | [*]N(C)CC1CC1         | -4.924 | -6.015 | -26.619 |
| 266 | DC-495 | A=A1AAAA1a2aaaa(a2)AAa(aa3)a(a34)AAa5a4aaaa5 | OPLS-2005 | 9.204 | [*]N(C1)CC[C@@H]1CN   | -4.918 | -6.493 | -45.514 |
| 267 | DC-496 | A=A1AAAA1a2aaaa(a2)AAa(aa3)a(a34)AAa5a4aaaa5 | OPLS-2005 | 9.148 | [*]c1c(N)cccn1        | -4.875 | -6.061 | -45.498 |
| 268 | DC-497 | A=A1AAAA1a2aaaa(a2)AAa(aa3)a(a34)AAa5a4aaaa5 | OPLS-2005 | 9.055 | [*]N(C)C1CC1          | -4.869 | -6.863 | -34.921 |
| 269 | DC-498 | A=A1AAAA1a2aaaa(a2)AAa(aa3)a(a34)AAa5a4aaaa5 | OPLS-2005 | 9.481 | [*]N1[C@@H](C)CC1(C)C | -4.856 | -5.146 | -37.889 |
| 270 | DC-499 | A=A1AAAA1a2aaaa(a2)AAa(aa3)a(a34)AAa5a4aaaa5 | OPLS-2005 | 9.103 | [*]c1nc(C)cn1C        | -4.806 | -6.731 | -44.544 |
| 271 | DC-500 | A=A1AAAA1a2aaaa(a2)AAa(aa3)a(a34)AAa5a4aaaa5 | OPLS-2005 | 9.023 | [*]CNC1(CN)CC1        | -4.787 | -6.121 | -20.954 |
| 272 | DC-501 | A=A1AAAA1a2aaaa(a2)AAa(aa3)a(a34)AAa5a4aaaa5 | OPLS-2005 | 9.082 | [*]N[C@@H](C)C1CCC1   | -4.780 | -5.942 | -46.130 |
| 273 | DC-502 | A=A1AAAA1a2aaaa(a2)AAa(aa3)a(a34)AAa5a4aaaa5 | OPLS-2005 | 9.082 | [*]c1cncn1C           | -4.731 | -6.266 | -40.670 |
| 274 | DC-503 | A=A1AAAA1a2aaaa(a2)AAa(aa3)a(a34)AAa5a4aaaa5 | OPLS-2005 | 9.356 | [*]NC(C)(C)C(C)C      | -4.718 | -6.231 | -47.081 |
| 275 | DC-504 | A=A1AAAA1a2aaaa(a2)AAa(aa3)a(a34)AAa5a4aaaa5 | OPLS-2005 | 9.201 | [*]NIC[C@@H](N)C1(C)C | -4.712 | -4.837 | -23.645 |
| 276 | DC-505 | A=A1AAAA1a2aaaa(a2)AAa(aa3)a(a34)AAa5a4aaaa5 | OPLS-2005 | 9.012 | [*]c1cc(CN)oc1        | -4.631 | -4.746 | -36.220 |
| 277 | DC-506 | A=A1AAAA1a2aaaa(a2)AAa(aa3)a(a34)AAa5a4aaaa5 | OPLS-2005 | 9.116 | [*]c1ccc([nH]1)CC     | -4.612 | -7.064 | -45.003 |
| 278 | DC-507 | A=A1AAAA1a2aaaa(a2)AAa(aa3)a(a34)AAa5a4aaaa5 | OPLS-2005 | 9.102 | [*]OC1([C@H](C)N)CC1  | -4.584 | -5.128 | -27.433 |
| 279 | DC-508 | A=A1AAAA1a2aaaa(a2)AAa(aa3)a(a34)AAa5a4aaaa5 | OPLS-2005 | 9.033 | [*]N(C1)CC1F          | -4.568 | -5.510 | -21.381 |
| 280 | DC-509 | A=A1AAAA1a2aaaa(a2)AAa(aa3)a(a34)AAa5a4aaaa5 | OPLS-2005 | 9.082 | [*]N(C1)CC1(C)O       | -4.565 | -6.085 | -35.856 |
| 281 | DC-510 | A=A1AAAA1a2aaaa(a2)AAa(aa3)a(a34)AAa5a4aaaa5 | OPLS-2005 | 9.091 | [*]CN(C)C(C)(C)C      | -4.538 | -6.037 | -48.442 |
| 282 | DC-511 | A=A1AAAA1a2aaaa(a2)AAa(aa3)a(a34)AAa5a4aaaa5 | OPLS-2005 | 9.155 | CCN([*])CC            | -4.488 | -6.058 | -35.418 |
| 283 | DC-512 | A=A1AAAA1a2aaaa(a2)AAa(aa3)a(a34)AAa5a4aaaa5 | OPLS-2005 | 9.082 | [*]c1ncc(N)n1C        | -4.485 | -4.591 | -41.311 |
| 284 | DC-513 | A=A1AAAA1a2aaaa(a2)AAa(aa3)a(a34)AAa5a4aaaa5 | OPLS-2005 | 9.066 | [*]OCC1(C)CCC1        | -4.462 | -4.686 | -2.719  |
| 285 | DC-514 | A=A1AAAA1a2aaaa(a2)AAa(aa3)a(a34)AAa5a4aaaa5 | OPLS-2005 | 9.072 | [*]O[C@@H](C)C1(N)CC1 | -4.427 | -4.981 | -31.992 |
| 286 | DC-515 | A=A1AAAA1a2aaaa(a2)AAa(aa3)a(a34)AAa5a4aaaa5 | OPLS-2005 | 9.005 | [*][N-]C1CCNC1        | -4.419 | -5.520 | -35.301 |
| 287 | DC-516 | A=A1AAAA1a2aaaa(a2)AAa(aa3)a(a34)AAa5a4aaaa5 | OPLS-2005 | 9.175 | [*]CC1(C)[C@H](N)CC1  | -4.412 | -5.622 | -36.798 |

|     |        |                                             |           |       |                       |        |        |         |
|-----|--------|---------------------------------------------|-----------|-------|-----------------------|--------|--------|---------|
| 288 | DC-517 | A=A1AAAA1a2aaa(a2)AAa(aa3)a(a34)AAa5a4aaaa5 | OPLS-2005 | 9.068 | [*]N(C1)CC1C          | -4.379 | -5.693 | -46.268 |
| 289 | DC-518 | A=A1AAAA1a2aaa(a2)AAa(aa3)a(a34)AAa5a4aaaa5 | OPLS-2005 | 9.116 | [*]CCC(N)C1CC1        | -4.314 | -5.942 | -40.297 |
| 290 | DC-519 | A=A1AAAA1a2aaa(a2)AAa(aa3)a(a34)AAa5a4aaaa5 | OPLS-2005 | 9.068 | [*]N(C1)CC1C          | -4.294 | -5.213 | -13.475 |
| 291 | DC-520 | A=A1AAAA1a2aaa(a2)AAa(aa3)a(a34)AAa5a4aaaa5 | OPLS-2005 | 9.063 | [*]c1c(O)ccs1         | -4.291 | -5.907 | -43.644 |
| 292 | DC-521 | A=A1AAAA1a2aaa(a2)AAa(aa3)a(a34)AAa5a4aaaa5 | OPLS-2005 | 9.112 | [*]OC1(CN)CCC1        | -4.281 | -6.200 | -17.688 |
| 293 | DC-522 | A=A1AAAA1a2aaa(a2)AAa(aa3)a(a34)AAa5a4aaaa5 | OPLS-2005 | 9.157 | O=C1N([*])CCCN1       | -4.276 | -4.890 | -40.115 |
| 294 | DC-523 | A=A1AAAA1a2aaa(a2)AAa(aa3)a(a34)AAa5a4aaaa5 | OPLS-2005 | 9.106 | [*]N[C@@H](C1(C)C)CN1 | -4.261 | -5.609 | -22.303 |
| 295 | DC-524 | A=A1AAAA1a2aaa(a2)AAa(aa3)a(a34)AAa5a4aaaa5 | OPLS-2005 | 9.059 | [*]CC1(O)C[C@H](C)C1  | -4.255 | -4.618 | -40.517 |
| 296 | DC-525 | A=A1AAAA1a2aaa(a2)AAa(aa3)a(a34)AAa5a4aaaa5 | OPLS-2005 | 9.367 | [*]N(C)C(C)(C)CN      | -4.245 | -5.449 | -37.072 |
| 297 | DC-526 | A=A1AAAA1a2aaa(a2)AAa(aa3)a(a34)AAa5a4aaaa5 | OPLS-2005 | 9.216 | CCN([*])C1CC1         | -4.227 | -5.195 | -31.644 |
| 298 | DC-527 | A=A1AAAA1a2aaa(a2)AAa(aa3)a(a34)AAa5a4aaaa5 | OPLS-2005 | 9.184 | [*]c1ccc(N)cc1        | -4.175 | -6.426 | -46.554 |
| 299 | DC-528 | A=A1AAAA1a2aaa(a2)AAa(aa3)a(a34)AAa5a4aaaa5 | OPLS-2005 | 9.255 | C1CN([*])CCC1O        | -4.167 | -5.330 | -40.711 |
| 300 | DC-529 | A=A1AAAA1a2aaa(a2)AAa(aa3)a(a34)AAa5a4aaaa5 | OPLS-2005 | 9.282 | [*]N(C1)CCCC1O        | -4.094 | -6.812 | -0.619  |
| 301 | DC-530 | A=A1AAAA1a2aaa(a2)AAa(aa3)a(a34)AAa5a4aaaa5 | OPLS-2005 | 9.182 | [*]CC(C)(O)C(C)C      | -4.091 | -4.932 | -19.866 |
| 302 | DC-531 | A=A1AAAA1a2aaa(a2)AAa(aa3)a(a34)AAa5a4aaaa5 | OPLS-2005 | 9.090 | [*]CC(C)(N)[C@H](C)O  | -4.072 | -6.111 | -29.755 |
| 303 | DC-532 | A=A1AAAA1a2aaa(a2)AAa(aa3)a(a34)AAa5a4aaaa5 | OPLS-2005 | 9.033 | [*]OCC1(CC1)NC        | -4.071 | -6.214 | -49.232 |
| 304 | DC-533 | A=A1AAAA1a2aaa(a2)AAa(aa3)a(a34)AAa5a4aaaa5 | OPLS-2005 | 9.477 | CCN([*])C(C)(C)C      | -4.039 | -4.322 | -41.558 |
| 305 | DC-534 | A=A1AAAA1a2aaa(a2)AAa(aa3)a(a34)AAa5a4aaaa5 | OPLS-2005 | 9.253 | [*]N(C)CC1(N)CC1      | -4.027 | -6.296 | -19.951 |
| 306 | DC-535 | A=A1AAAA1a2aaa(a2)AAa(aa3)a(a34)AAa5a4aaaa5 | OPLS-2005 | 9.011 | [*]NC(C)C1CC1         | -4.012 | -4.404 | -34.721 |
| 307 | DC-536 | A=A1AAAA1a2aaa(a2)AAa(aa3)a(a34)AAa5a4aaaa5 | OPLS-2005 | 9.095 | [*]c1c(C)coc1         | -4.010 | -5.847 | -38.845 |
| 308 | DC-537 | A=A1AAAA1a2aaa(a2)AAa(aa3)a(a34)AAa5a4aaaa5 | OPLS-2005 | 9.112 | [*]c1cncn1CC          | -3.996 | -6.560 | -37.832 |
| 309 | DC-538 | A=A1AAAA1a2aaa(a2)AAa(aa3)a(a34)AAa5a4aaaa5 | OPLS-2005 | 9.074 | [*]c1c(O)cc[nH]1      | -3.989 | -4.095 | -42.019 |
| 310 | DC-539 | A=A1AAAA1a2aaa(a2)AAa(aa3)a(a34)AAa5a4aaaa5 | OPLS-2005 | 9.060 | [*]NC(C)(C)C          | -3.987 | -5.489 | -37.663 |

|     |        |                                              |           |       |                            |        |        |         |
|-----|--------|----------------------------------------------|-----------|-------|----------------------------|--------|--------|---------|
| 311 | DC-540 | A=A1AAAA1a2aaaa(a2)AAa(aa3)a(a34)AAa5a4aaaa5 | OPLS-2005 | 9.317 | [*]N1CC[C@@H]1CCC          | -3.975 | -4.952 | -37.701 |
| 312 | DC-541 | A=A1AAAA1a2aaaa(a2)AAa(aa3)a(a34)AAa5a4aaaa5 | OPLS-2005 | 9.148 | [*]CC(C)(CN)NC             | -3.958 | -6.676 | -21.611 |
| 313 | DC-542 | A=A1AAAA1a2aaaa(a2)AAa(aa3)a(a34)AAa5a4aaaa5 | OPLS-2005 | 9.108 | [*]N(C)[C@@H]1C[C@@H](C1)N | -3.883 | -5.896 | -43.246 |
| 314 | DC-543 | A=A1AAAA1a2aaaa(a2)AAa(aa3)a(a34)AAa5a4aaaa5 | OPLS-2005 | 9.201 | [*]N1C[C@@H](N)C1(C)C      | -3.868 | -5.799 | -38.128 |
| 315 | DC-544 | A=A1AAAA1a2aaaa(a2)AAa(aa3)a(a34)AAa5a4aaaa5 | OPLS-2005 | 9.052 | [*]CC(N)C(C)(C)C           | -3.853 | -5.030 | -37.132 |
| 316 | DC-545 | A=A1AAAA1a2aaaa(a2)AAa(aa3)a(a34)AAa5a4aaaa5 | OPLS-2005 | 9.151 | [*]c1c(C)onc1O             | -3.837 | -5.029 | -45.446 |
| 317 | DC-546 | A=A1AAAA1a2aaaa(a2)AAa(aa3)a(a34)AAa5a4aaaa5 | OPLS-2005 | 9.104 | [*]N(C1)CC1N(C)C           | -3.782 | -5.105 | -41.108 |
| 318 | DC-547 | A=A1AAAA1a2aaaa(a2)AAa(aa3)a(a34)AAa5a4aaaa5 | OPLS-2005 | 9.137 | [*]CN(C)C(C)CN             | -3.779 | -6.375 | -40.488 |
| 319 | DC-548 | A=A1AAAA1a2aaaa(a2)AAa(aa3)a(a34)AAa5a4aaaa5 | OPLS-2005 | 9.367 | [*]N(C)C(C)(C)CN           | -3.709 | -5.115 | -45.516 |
| 320 | DC-549 | A=A1AAAA1a2aaaa(a2)AAa(aa3)a(a34)AAa5a4aaaa5 | OPLS-2005 | 9.068 | [*]N(C1)CC1C               | -3.645 | -5.655 | -4.087  |
| 321 | DC-550 | A=A1AAAA1a2aaaa(a2)AAa(aa3)a(a34)AAa5a4aaaa5 | OPLS-2005 | 9.140 | [*]c1c(CN)occ1             | -3.614 | -4.819 | -36.993 |
| 322 | DC-551 | A=A1AAAA1a2aaaa(a2)AAa(aa3)a(a34)AAa5a4aaaa5 | OPLS-2005 | 9.166 | [*]N(C1)CC1(F)CN           | -3.578 | -4.826 | -22.881 |
| 323 | DC-552 | A=A1AAAA1a2aaaa(a2)AAa(aa3)a(a34)AAa5a4aaaa5 | OPLS-2005 | 9.016 | [*]CC1(C)CC1               | -3.567 | -5.092 | -32.788 |
| 324 | DC-553 | A=A1AAAA1a2aaaa(a2)AAa(aa3)a(a34)AAa5a4aaaa5 | OPLS-2005 | 9.171 | [*]c1cc(C)ccn1             | -3.545 | -6.231 | -43.928 |
| 325 | DC-554 | A=A1AAAA1a2aaaa(a2)AAa(aa3)a(a34)AAa5a4aaaa5 | OPLS-2005 | 9.054 | [*]CC1(C)CNC1              | -3.529 | -5.844 | -25.033 |
| 326 | DC-555 | A=A1AAAA1a2aaaa(a2)AAa(aa3)a(a34)AAa5a4aaaa5 | OPLS-2005 | 9.064 | [*]CC(C)(O)CCC             | -3.525 | -5.204 | -40.857 |
| 327 | DC-556 | A=A1AAAA1a2aaaa(a2)AAa(aa3)a(a34)AAa5a4aaaa5 | OPLS-2005 | 9.123 | [*]c1ncc(C)n1C             | -3.458 | -5.848 | -44.721 |
| 328 | DC-557 | A=A1AAAA1a2aaaa(a2)AAa(aa3)a(a34)AAa5a4aaaa5 | OPLS-2005 | 9.188 | [*]CC1(C)[C@H](C)NC1       | -3.452 | -3.553 | -13.382 |
| 329 | DC-558 | A=A1AAAA1a2aaaa(a2)AAa(aa3)a(a34)AAa5a4aaaa5 | OPLS-2005 | 9.148 | [*]c1c(C)[nH]cc1           | -3.304 | -5.756 | -42.387 |
| 330 | DC-559 | A=A1AAAA1a2aaaa(a2)AAa(aa3)a(a34)AAa5a4aaaa5 | OPLS-2005 | 9.023 | [*]CC(F)(C)C               | -3.300 | -4.764 | -36.981 |
| 331 | DC-560 | A=A1AAAA1a2aaaa(a2)AAa(aa3)a(a34)AAa5a4aaaa5 | OPLS-2005 | 9.109 | [*]CC1(C#N)CCC1            | -3.293 | -3.390 | -34.178 |
| 332 | DC-561 | A=A1AAAA1a2aaaa(a2)AAa(aa3)a(a34)AAa5a4aaaa5 | OPLS-2005 | 9.512 | [*]N1CCCC1(C)C             | -3.262 | -5.312 | -35.733 |
| 333 | DC-562 | A=A1AAAA1a2aaaa(a2)AAa(aa3)a(a34)AAa5a4aaaa5 | OPLS-2005 | 9.073 | [*]CCC(C)(N)CO             | -3.157 | -5.738 | -49.405 |

|     |        |                                              |           |       |                         |        |        |         |
|-----|--------|----------------------------------------------|-----------|-------|-------------------------|--------|--------|---------|
| 334 | DC-563 | A=A1AAAA1a2aaaa(a2)AAa(aa3)a(a34)AAa5a4aaaa5 | OPLS-2005 | 9.072 | [*]O[C@@H](C)C1(N)CC1   | -3.130 | -4.834 | -35.808 |
| 335 | DC-564 | A=A1AAAA1a2aaaa(a2)AAa(aa3)a(a34)AAa5a4aaaa5 | OPLS-2005 | 9.029 | n1cn([*])ccc1=O         | -3.126 | -5.299 | -42.665 |
| 336 | DC-565 | A=A1AAAA1a2aaaa(a2)AAa(aa3)a(a34)AAa5a4aaaa5 | OPLS-2005 | 9.078 | [*]c1c(O)cn(n1)C        | -3.113 | -5.220 | -42.910 |
| 337 | DC-566 | A=A1AAAA1a2aaaa(a2)AAa(aa3)a(a34)AAa5a4aaaa5 | OPLS-2005 | 9.230 | O1CCN([*])C[C@@H]1C     | -3.094 | -5.344 | -42.408 |
| 338 | DC-567 | A=A1AAAA1a2aaaa(a2)AAa(aa3)a(a34)AAa5a4aaaa5 | OPLS-2005 | 9.046 | [*]N(C)CC(F)F           | -3.091 | -5.411 | -14.076 |
| 339 | DC-568 | A=A1AAAA1a2aaaa(a2)AAa(aa3)a(a34)AAa5a4aaaa5 | OPLS-2005 | 9.185 | [*]N(C1)CC1(C)OC        | -3.009 | -5.013 | -38.776 |
| 340 | DC-569 | A=A1AAAA1a2aaaa(a2)AAa(aa3)a(a34)AAa5a4aaaa5 | OPLS-2005 | 9.106 | [*]N[C@@H](C1(C)C)CN1   | -2.980 | -5.151 | -17.909 |
| 341 | DC-570 | A=A1AAAA1a2aaaa(a2)AAa(aa3)a(a34)AAa5a4aaaa5 | OPLS-2005 | 9.214 | [*]c1c(F)cccc1          | -2.900 | -5.488 | -40.448 |
| 342 | DC-571 | A=A1AAAA1a2aaaa(a2)AAa(aa3)a(a34)AAa5a4aaaa5 | OPLS-2005 | 9.112 | [*]c1cnclCC             | -2.890 | -5.403 | -43.348 |
| 343 | DC-572 | A=A1AAAA1a2aaaa(a2)AAa(aa3)a(a34)AAa5a4aaaa5 | OPLS-2005 | 9.090 | [*]c1cc(F)cnc1          | -2.835 | -5.521 | -37.054 |
| 344 | DC-573 | A=A1AAAA1a2aaaa(a2)AAa(aa3)a(a34)AAa5a4aaaa5 | OPLS-2005 | 9.146 | [*]CC(CO)N(C)C          | -2.815 | -4.519 | -12.806 |
| 345 | DC-574 | A=A1AAAA1a2aaaa(a2)AAa(aa3)a(a34)AAa5a4aaaa5 | OPLS-2005 | 9.050 | [*]c1cc(CO)c[nH]1       | -2.735 | -5.187 | -32.366 |
| 346 | DC-575 | A=A1AAAA1a2aaaa(a2)AAa(aa3)a(a34)AAa5a4aaaa5 | OPLS-2005 | 9.254 | [*]c1c(C)nccl1          | -2.725 | -5.411 | -41.555 |
| 347 | DC-576 | A=A1AAAA1a2aaaa(a2)AAa(aa3)a(a34)AAa5a4aaaa5 | OPLS-2005 | 9.137 | [*]N(C1)CC1(N)CC        | -2.640 | -5.294 | -41.693 |
| 348 | DC-577 | A=A1AAAA1a2aaaa(a2)AAa(aa3)a(a34)AAa5a4aaaa5 | OPLS-2005 | 9.030 | [*]CN1CCNCC1            | -2.629 | -4.960 | -42.710 |
| 349 | DC-578 | A=A1AAAA1a2aaaa(a2)AAa(aa3)a(a34)AAa5a4aaaa5 | OPLS-2005 | 9.201 | [*]c1cc(C#N)ccc1        | -2.628 | -5.217 | -41.620 |
| 350 | DC-579 | A=A1AAAA1a2aaaa(a2)AAa(aa3)a(a34)AAa5a4aaaa5 | OPLS-2005 | 9.039 | [*]CC1(O)CCC1           | -2.601 | -4.222 | -35.527 |
| 351 | DC-580 | A=A1AAAA1a2aaaa(a2)AAa(aa3)a(a34)AAa5a4aaaa5 | OPLS-2005 | 9.287 | [*]N(C)[C@@H](C1)C1(C)C | -2.549 | -3.629 | -31.452 |
| 352 | DC-581 | A=A1AAAA1a2aaaa(a2)AAa(aa3)a(a34)AAa5a4aaaa5 | OPLS-2005 | 9.015 | [*]NCC(C)(C)CO          | -2.543 | -3.456 | -35.856 |
| 353 | DC-582 | A=A1AAAA1a2aaaa(a2)AAa(aa3)a(a34)AAa5a4aaaa5 | OPLS-2005 | 9.153 | [*]CC1(C)CCNC1          | -2.539 | -4.645 | -34.009 |
| 354 | DC-583 | A=A1AAAA1a2aaaa(a2)AAa(aa3)a(a34)AAa5a4aaaa5 | OPLS-2005 | 9.103 | [*]c1nc(C)cn1C          | -2.476 | -4.656 | -16.837 |
| 355 | DC-584 | A=A1AAAA1a2aaaa(a2)AAa(aa3)a(a34)AAa5a4aaaa5 | OPLS-2005 | 9.200 | [*]c1ccc(C)cc1          | -2.431 | -4.449 | -32.816 |
| 356 | DC-585 | A=A1AAAA1a2aaaa(a2)AAa(aa3)a(a34)AAa5a4aaaa5 | OPLS-2005 | 9.074 | [*]c1ccc([nH]1)CN       | -2.329 | -4.782 | -34.931 |

|     |        |                                             |           |       |                      |        |        |         |
|-----|--------|---------------------------------------------|-----------|-------|----------------------|--------|--------|---------|
| 357 | DC-586 | A=A1AAAA1a2aaa(a2)AAa(aa3)a(a34)AAa5a4aaaa5 | OPLS-2005 | 9.078 | [*]c1ncc([nH]1)CC    | -2.285 | -4.852 | -40.038 |
| 358 | DC-587 | A=A1AAAA1a2aaa(a2)AAa(aa3)a(a34)AAa5a4aaaa5 | OPLS-2005 | 9.261 | [*]c1c(C)ccn1C       | -2.185 | -4.638 | -39.112 |
| 359 | DC-588 | A=A1AAAA1a2aaa(a2)AAa(aa3)a(a34)AAa5a4aaaa5 | OPLS-2005 | 9.011 | [*]NC(C)C1CC1        | -2.138 | -4.203 | -35.436 |
| 360 | DC-589 | A=A1AAAA1a2aaa(a2)AAa(aa3)a(a34)AAa5a4aaaa5 | OPLS-2005 | 9.094 | [*]c1c(C#N)[nH]cc1   | -2.131 | -4.610 | -38.747 |
| 361 | DC-590 | A=A1AAAA1a2aaa(a2)AAa(aa3)a(a34)AAa5a4aaaa5 | OPLS-2005 | 9.244 | [*]c1c(N)ccn1C       | -2.098 | -4.472 | -38.093 |
| 362 | DC-591 | A=A1AAAA1a2aaa(a2)AAa(aa3)a(a34)AAa5a4aaaa5 | OPLS-2005 | 9.104 | [*]N(C1)CC1N(C)C     | -2.067 | -4.721 | -18.919 |
| 363 | DC-592 | A=A1AAAA1a2aaa(a2)AAa(aa3)a(a34)AAa5a4aaaa5 | OPLS-2005 | 9.023 | [*]CNC1(CN)CC1       | -2.011 | -4.325 | -17.338 |
| 364 | DC-593 | A=A1AAAA1a2aaa(a2)AAa(aa3)a(a34)AAa5a4aaaa5 | OPLS-2005 | 9.073 | [*]CCC(C)(N)CO       | -1.975 | -4.499 | -35.088 |
| 365 | DC-594 | A=A1AAAA1a2aaa(a2)AAa(aa3)a(a34)AAa5a4aaaa5 | OPLS-2005 | 9.195 | [*]c1ccc(C#N)cc1     | -1.863 | -4.451 | -31.777 |
| 366 | DC-595 | A=A1AAAA1a2aaa(a2)AAa(aa3)a(a34)AAa5a4aaaa5 | OPLS-2005 | 9.172 | [*]CC1(C)C(C)(C)C1   | -1.819 | -4.382 | -38.187 |
| 367 | DC-596 | A=A1AAAA1a2aaa(a2)AAa(aa3)a(a34)AAa5a4aaaa5 | OPLS-2005 | 9.067 | [*]NC(C)(C)CO        | -1.761 | -3.135 | -31.918 |
| 368 | DC-597 | A=A1AAAA1a2aaa(a2)AAa(aa3)a(a34)AAa5a4aaaa5 | OPLS-2005 | 9.090 | [*]CC(C)(N)[C@H](C)O | -1.699 | -3.521 | -31.922 |
| 369 | DC-598 | A=A1AAAA1a2aaa(a2)AAa(aa3)a(a34)AAa5a4aaaa5 | OPLS-2005 | 9.229 | [*]c1cccn1CC         | -1.673 | -4.126 | -35.345 |
| 370 | DC-599 | A=A1AAAA1a2aaa(a2)AAa(aa3)a(a34)AAa5a4aaaa5 | OPLS-2005 | 9.314 | [*]N(C1)CCC[C@H]1C   | -1.531 | -3.029 | -28.160 |
| 371 | DC-600 | A=A1AAAA1a2aaa(a2)AAa(aa3)a(a34)AAa5a4aaaa5 | OPLS-2005 | 9.357 | [*]N(C)C(C)(C)C      | -0.801 | -2.304 | -31.399 |

Table S5: The specific residues involved in the receptor-ligand interaction of reference and designed compounds using molecular docking analysis.

| S.NO | Active Ligands | Hydrophobic Interactions                                                                                            |                  |          |           | Hydrogen Bond Interactions |                                 |         | Total number of Interactions |
|------|----------------|---------------------------------------------------------------------------------------------------------------------|------------------|----------|-----------|----------------------------|---------------------------------|---------|------------------------------|
|      |                | Alkyl-Alkyl and Pi-Alkyl                                                                                            | Pi-Pi            | Pi-sigma | Pi-Sulfur | Classical                  | Non-Classical (Carbon-Hydrogen) | Halogen |                              |
| 1    | RC-01          | ARG-109, ALA-111, ARG-119, TRP-124, ILE-128, ILE-130, VAL-255, MET-259, VAL-281, MET-291                            | TRP-124, TRP-267 | Nil      | Nil       | LEU-120, ILE-128           | SER-278, SER-287                | VAL-255 | 23                           |
| 2    | RC-02          | ARG-109, ALA-111, TRP-124, ILE-128, ILE-130, VAL-255, MET-259, VAL-281, MET-291                                     | TRP-124          | Nil      | Nil       | LEU-120, ILE-128           | ARG-119, SER-287                | VAL-255 | 18                           |
| 3    | DC-01          | ARG-109, ALA-111, ILE-113, ILE-117, ARG-119, TRP-124, ILE-128, ILE-130, VAL-255, MET-259, TRP-267, MET-290, MET-291 | TRP-124          | Nil      | Nil       | ILE-128                    | PRO-118, VAL-255                | ILE-117 | 23                           |
| 4    | DC-02          | ARG-109, ALA-111, ILE-113, ILE-117, ARG-119, TRP-124, ILE-128, ILE-130, VAL-255, MET-259, MET-290, MET-291          | TRP-124, TRP-267 |          |           | ILE-112, ILE-128           |                                 | VAL-255 | 22                           |
| 5    | DC-03          | ARG-109, ALA-111, ILE-113, ILE-117, ARG-119, TRP-124, ILE-128, ILE-130, VAL-255, MET-259, MET-290, MET-291          | TRP-124          | Nil      | Nil       | ILE-128                    | PRO-118, VAL-255                | VAL-255 | 25                           |
| 6    | DC-04          | ARG-109, ALA-111, ILE-112, ILE-117, TRP-124, ILE-128, ILE-130, VAL-255, MET-259, TYR-285, MET-                      | TRP-124          | Nil      | Nil       | ILE-128                    | Nil                             | VAL-255 | 20                           |

|  |  |                          |  |  |  |  |  |  |  |
|--|--|--------------------------|--|--|--|--|--|--|--|
|  |  | 290, MET-291,<br>CYC-379 |  |  |  |  |  |  |  |
|--|--|--------------------------|--|--|--|--|--|--|--|
